# Supplementary material for: Novel elastic rubbers from CO2-based polycarbonates
Source: Royal Society of Chemistry journal article supplement (doi:10.1039/d3gc02374e), 2023-01-01
Supplement: d3gc02374e1.pdf [file d3gc02374e1.pdf]

## **Novel Elastic Rubbers from CO<sub>2</sub>-based Polycarbonates**

Giulia Chiarioni,<sup>1</sup> Martin van Duin<sup>1,2</sup> and Paolo P. Pescarmona<sup>1,\*</sup>

<sup>1</sup> Chemical Engineering group, Engineering and Technology institute Groningen (ENTEG), University of Groningen, Nijenborgh 4, 9747 AG Groningen, The Netherlands

<sup>2</sup> ARLANXEO Performance Elastomers, Innovation, P.O. Box 1130, 6160 BC Geleen, The Netherlands

\* Corresponding author. E-mail: [p.p.pescarmona@rug.nl](mailto:p.p.pescarmona@rug.nl)

## **Supporting Information**

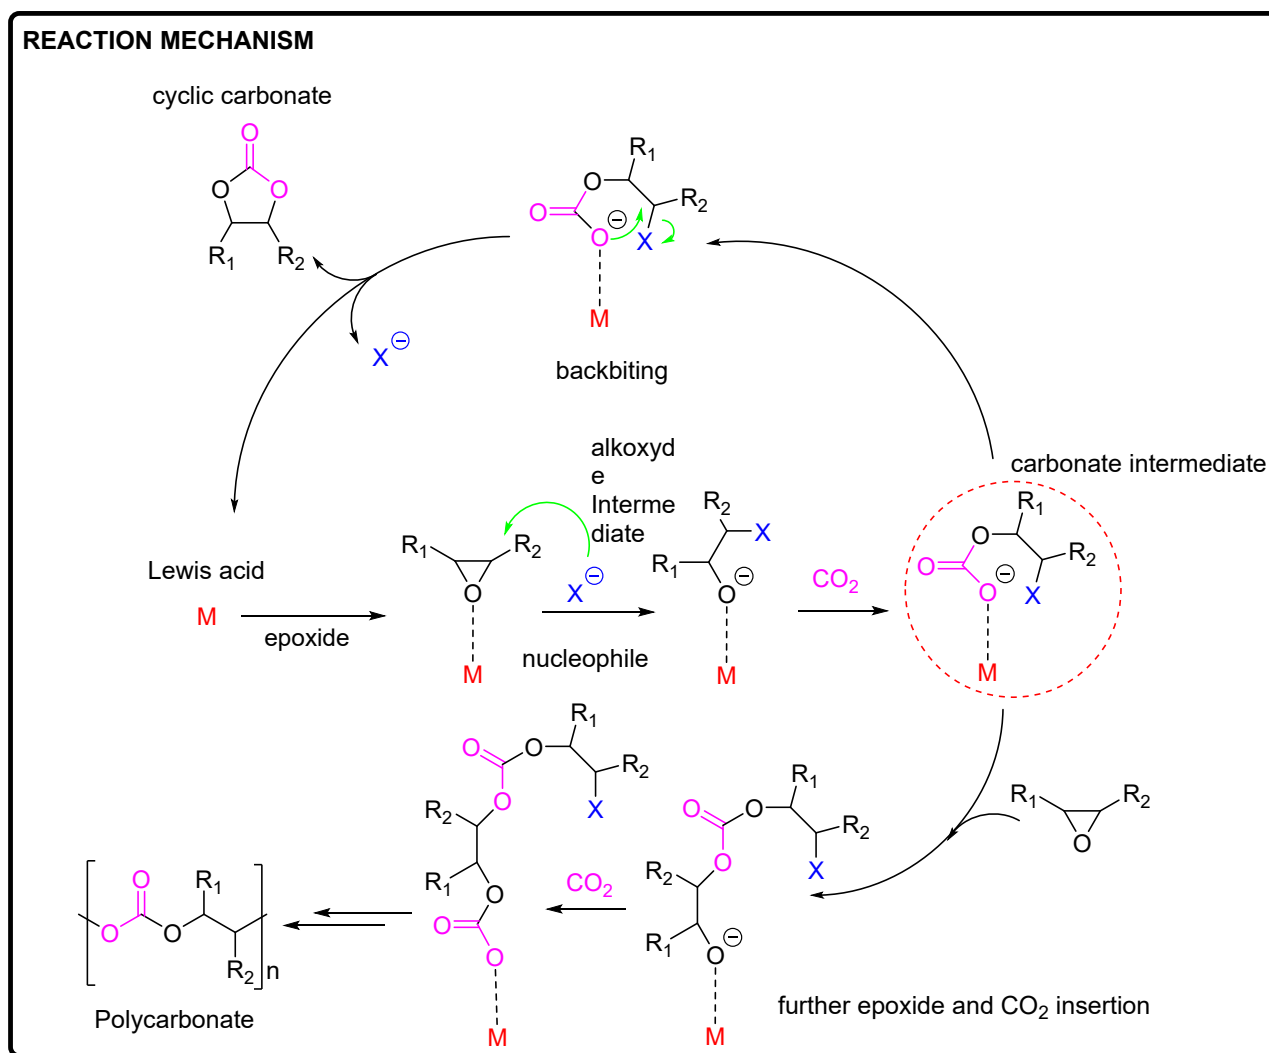

Figure S1. Proposed reaction mechanism for the coupling reaction between carbon dioxide and epoxides.

## High-throughput reactor

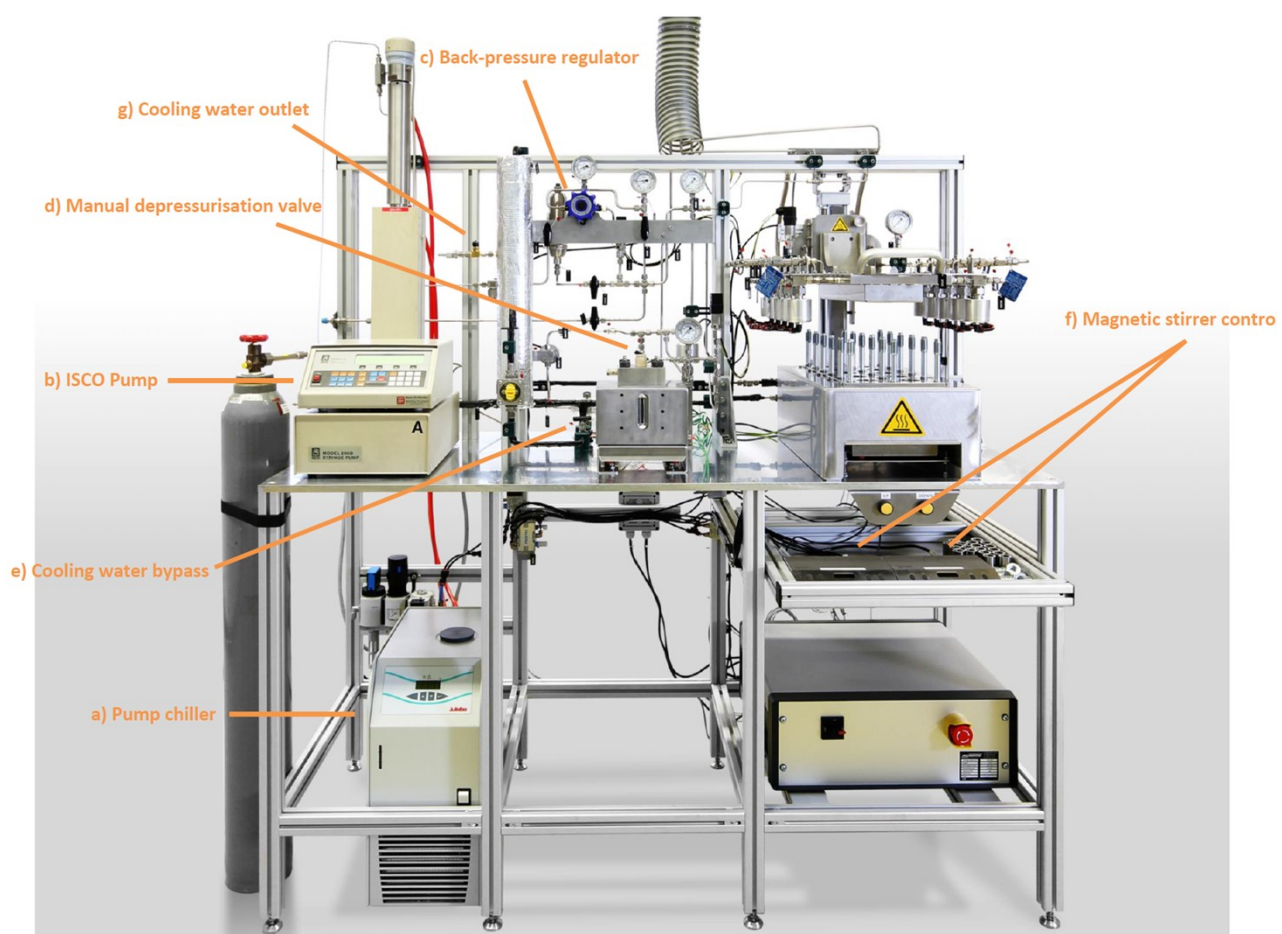

Figure S2. High-throughput unit used to perform the reactions with CO<sub>2</sub>.

## Duplicate and triplicate tests for the copolymerisation and terpolymerisation reactions

Table S1. Repeated copolymerisation and terpolymerisation tests showing the degree of reproducibility.

| Entry | Long alkyl chain epoxide | Unsaturated epoxide | Epoxides ratio | Conv % <sup>a</sup> | Sel % <sup>b</sup> | PC:EL  |
|-------|--------------------------|---------------------|----------------|---------------------|--------------------|--------|
| 1     | 1,2-epoxyhexane          |                     | 100:0          | 95                  | 93                 | 82:18  |
| 2     | 1,2-epoxyhexane          |                     | 100:0          | 96                  | 89                 | 73:27  |
| 3     | 1,2-epoxyoctane          |                     | 100:0          | 99                  | 81                 | 89:11  |
| 4     | 1,2-epoxydecane          |                     | 100:0          | 83                  | 93                 | 86:14  |
| 5     | 1,2-epoxydodecane        |                     | 100:0          | 93                  | 85                 | 86:14  |
| 6     | 1,2-epoxydodecane        | AGE                 | 95:5           | 95/>99              | 96                 | 92:8   |
| 7     | 1,2-epoxydodecane        | AGE                 | 80:20          | 90/95               | 97                 | 95:5   |
| 8     | 1,2-epoxydodecane        | AGE                 | 80:20          | 98/99               | 98                 | 92:8   |
|       | 1,2-epoxydodecane        | AGE                 | 80:20          | 98/>99              | 98                 | 89:11  |
| 9     | 1,2-epoxydodecane        | AGE                 | 50:50          | 99/>99              | 99                 | 90:10  |
| 10    |                          | AGE                 | 0:100          | 99                  | 99                 | >99:00 |
| 11    |                          | AGE                 | 0:100          | 99                  | 99                 | >99:00 |
| 12    | 1,2-epoxydecane          | AGE                 | 95:05          | 97/>99              | 98                 | 93:7   |
| 13    | 1,2-epoxydecane          | AGE                 | 95:5           | 94/>99              | 97                 | 94:6   |
| 14    | 1,2-epoxydecane          | AGE                 | 80:20          | 93/97               | 96                 | 93:7   |
| 15    | 1,2-epoxydecane          | AGE                 | 80:20          | 93/98               | 99                 | 90:10  |
|       | 1,2-epoxydecane          | AGE                 | 80:20          | 95/99               | 98                 | 88:12  |
|       | 1,2-epoxydecane          | AGE                 | 80:20          | >99/>99             | >99                | 93:7   |
| 16    | 1,2-epoxydecane          | AGE                 | 50:50          | 97/95               | >99                | 85:15  |
| 17    | 1,2-epoxydecane          | AGE                 | 95:05          | 97/>99              | 98                 | 93:7   |
| 18    | 1,2-epoxyoctane          | AGE                 | 80:20          | 98/>99              | 97                 | 91:9   |
|       | 1,2-epoxyoctane          | AGE                 | 80:20          | >99/>99             | 99                 | 93:7   |
| 19    | 1,2-epoxyoctane          | AGE                 | 95:5           | >99/>99             | 98                 | 93:7   |
| 20    | 1,2-epoxyoctane          | AGE                 | 50:50          | >99/99              | >99                | 88:12  |
| 21    | 1,2-epoxyhexane          | AGE                 | 80:20          | 99/>99              | 97                 | 94:6   |
| 22    | 1,2-epoxyhexane          | AGE                 | 95:5           | >99/>99             | 97                 | 93:7   |
| 23    | 1,2-epoxyhexane          | AGE                 | 50:50          | >99/>99             | >99                | 92:8   |

All the tests were performed by adding 30 mmol of epoxide(s), 3 mmol of mesitylene (IS), 0.5 mol % of Al complex and 0.25 mol % of PPNCl (2:1 ratio). The reactions were all performed at 80 bar, 45 °C for 24h. <sup>a</sup> Conversion of the epoxide.

<sup>b</sup> Selectivity of the reaction towards the synthesis of PC over CC.

**NMR and FT-IR characterisation of the products of the copolymerisations and terpolymerisations involving AGE and 1,2-epoxyhexane**

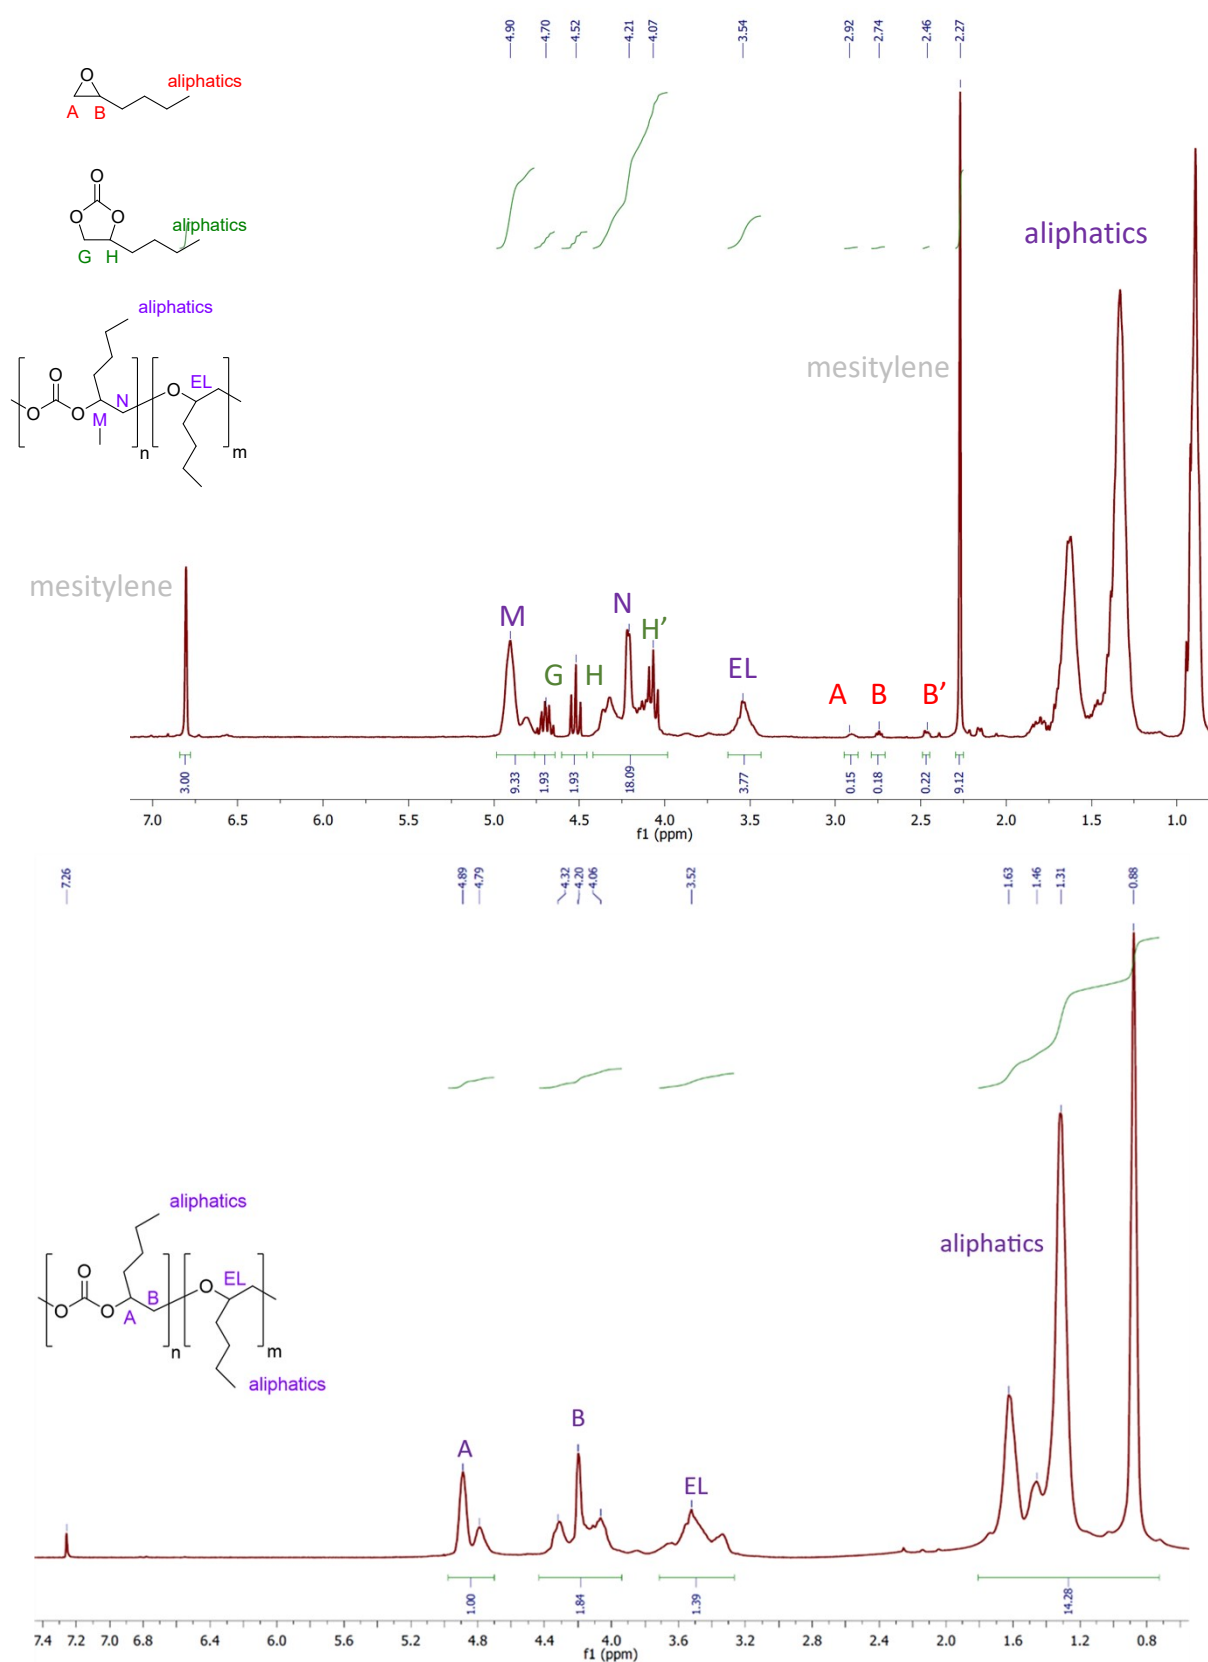

Figure S3.  $^1\text{H}$  NMR spectrum of the crude mixture after the copolymerisation of 1,2-epoxyhexane with  $\text{CO}_2$  (top) and of the purified polycarbonate (bottom).

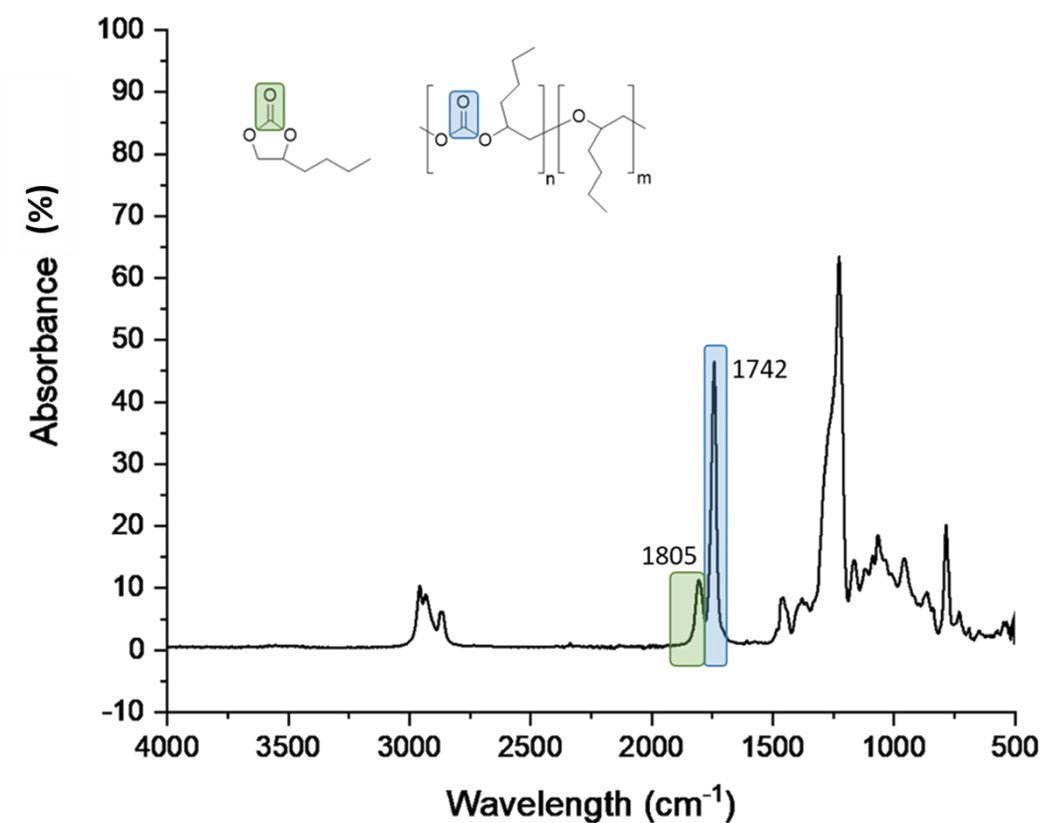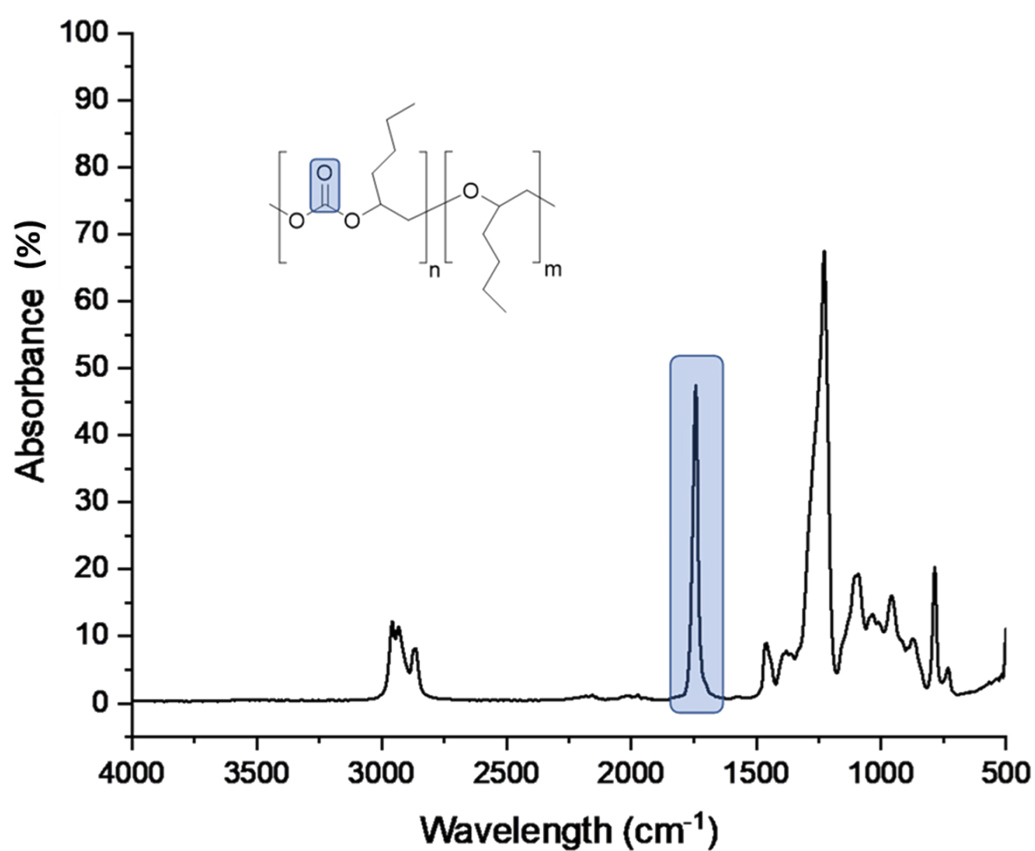

Figure S4. FT-IR spectrum of the crude mixture after the copolymerisation of 1,2-epoxyhexane with CO<sub>2</sub> (top) and of the purified polycarbonate (bottom).

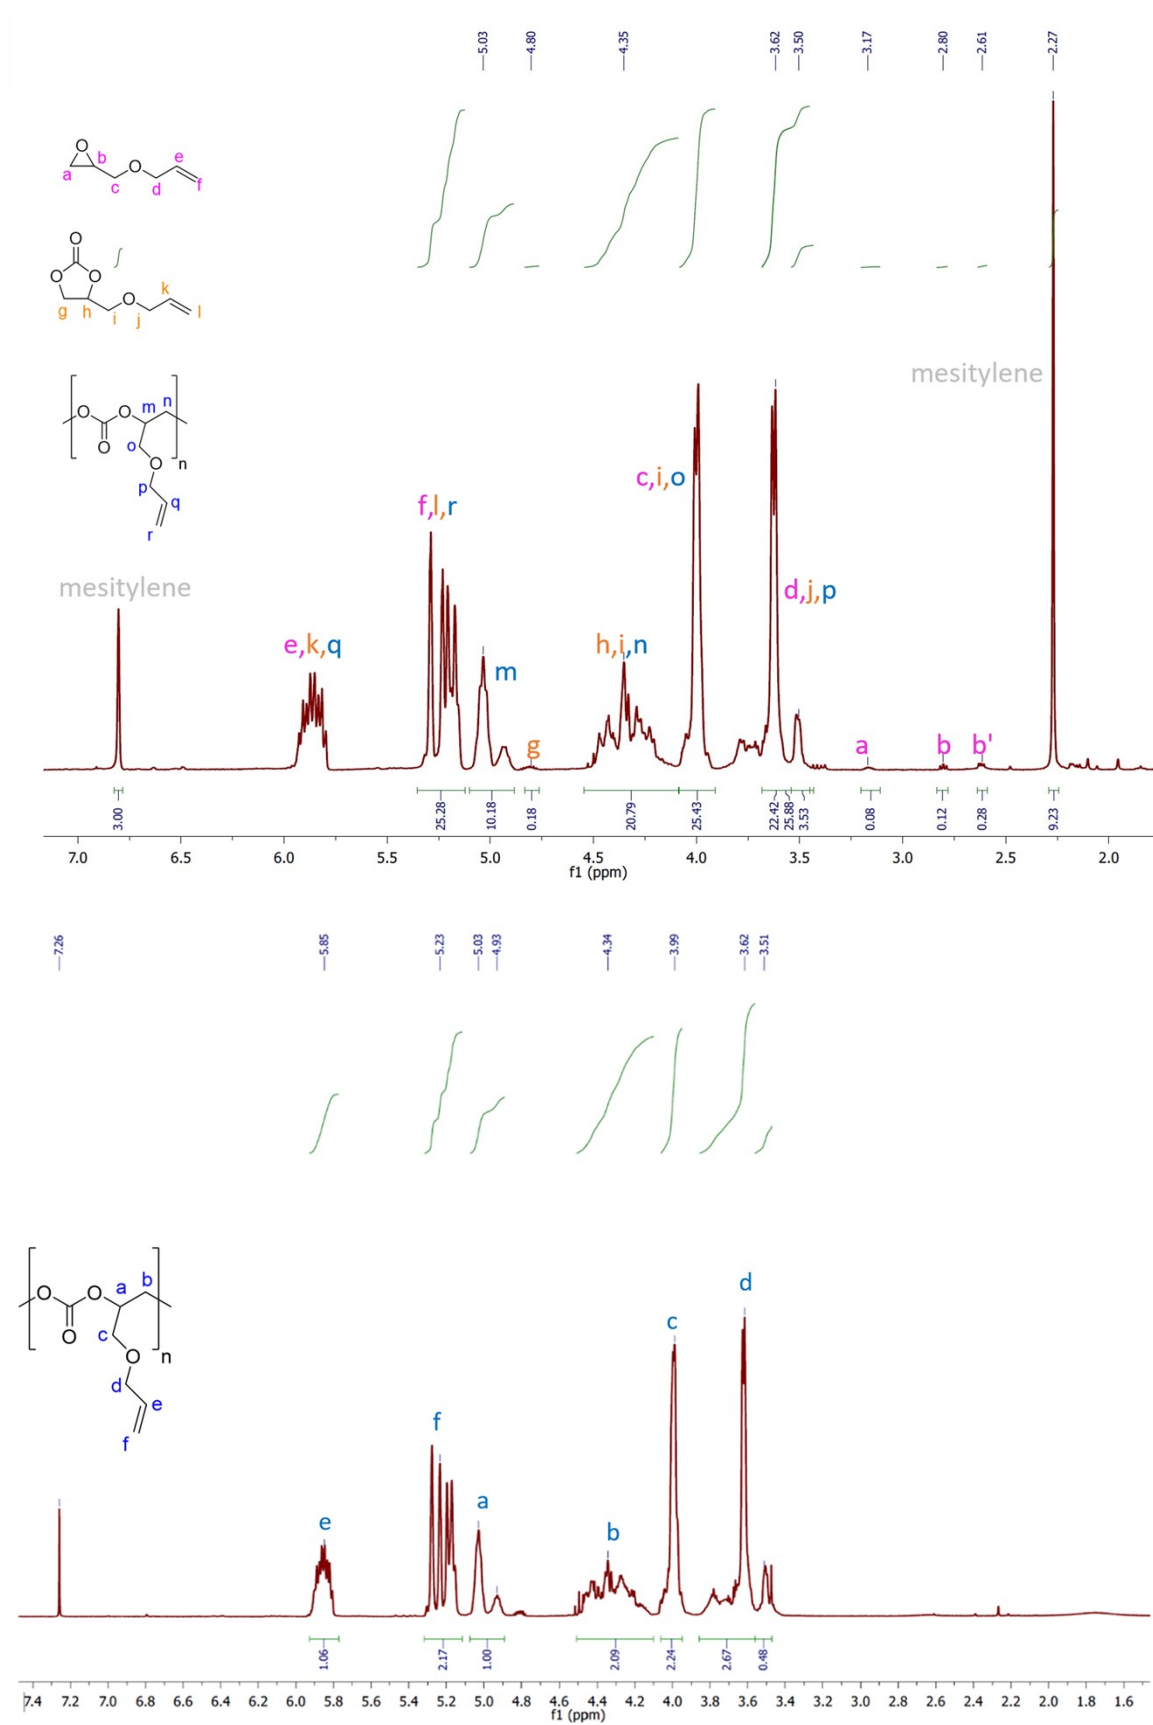

Figure S5. <sup>1</sup>H NMR spectrum of the crude mixture after the copolymerisation of AGE with CO<sub>2</sub> (top) and of the purified polycarbonate (bottom).

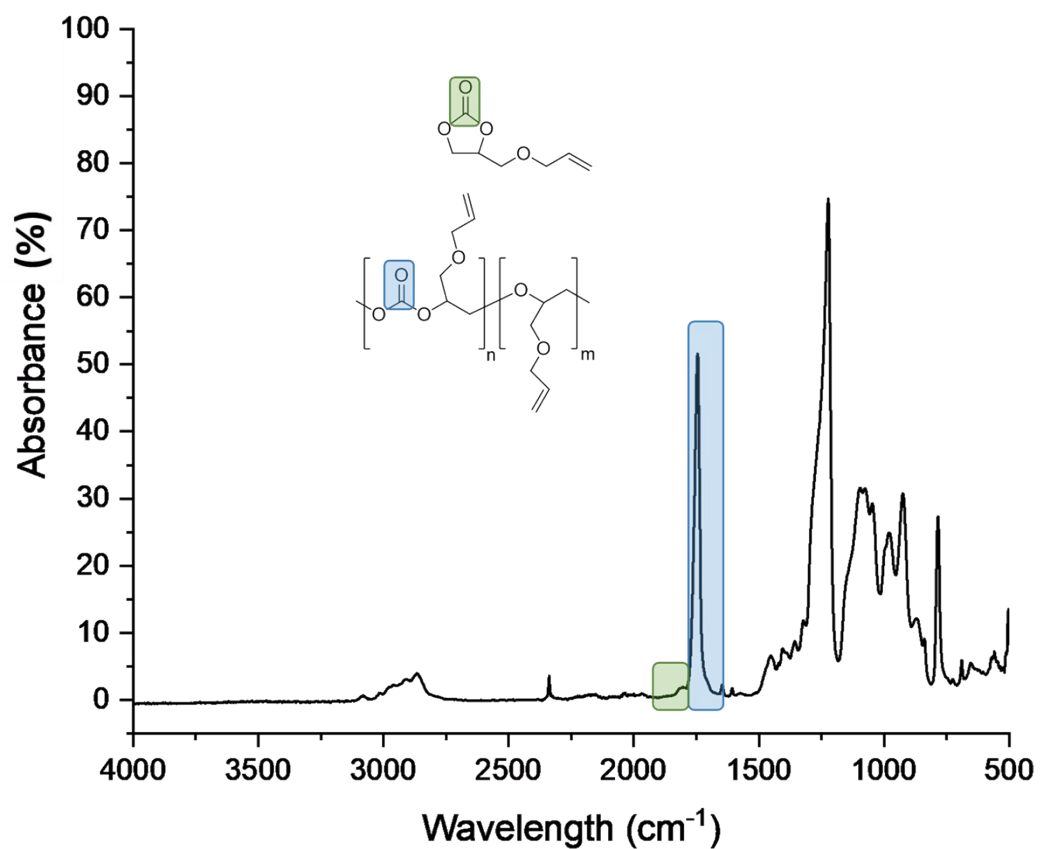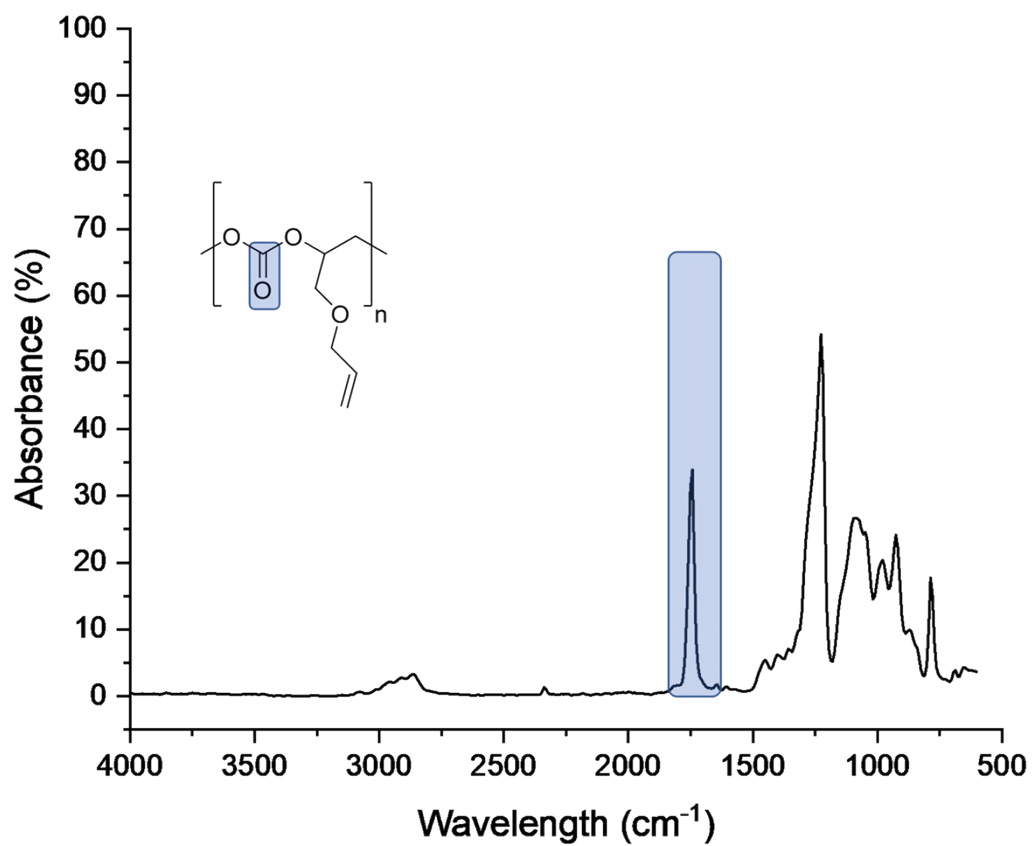

Figure S6. FT-IR spectrum of the crude mixture after the copolymerisation of AGE with CO<sub>2</sub> (top) and of the purified polycarbonate (bottom).

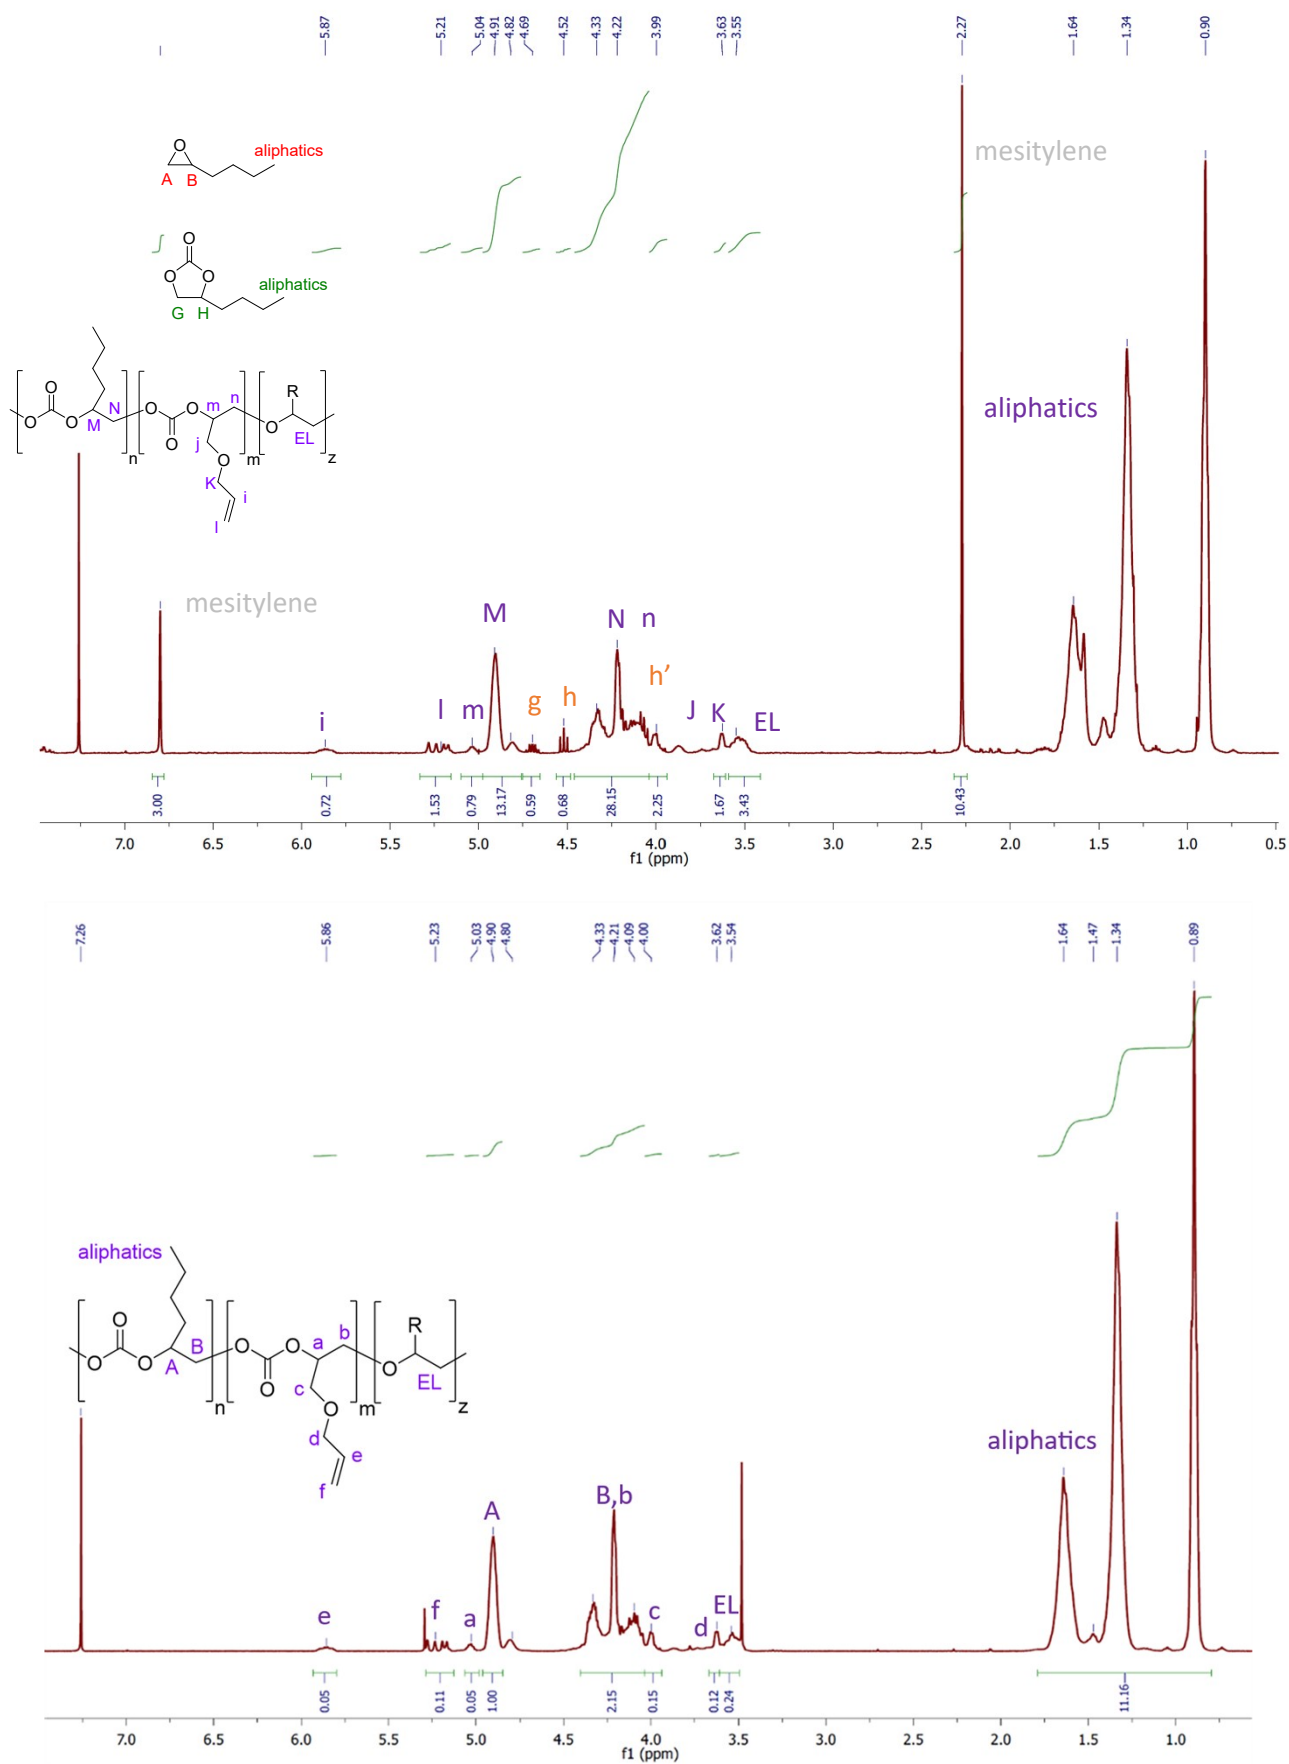

Figure S7.  $^1\text{H}$  NMR spectrum of the crude mixture after the terpolymerisation of 1,2-epoxyhexane and AGE (95:5) with  $\text{CO}_2$  (top) and of the purified polycarbonate (bottom).

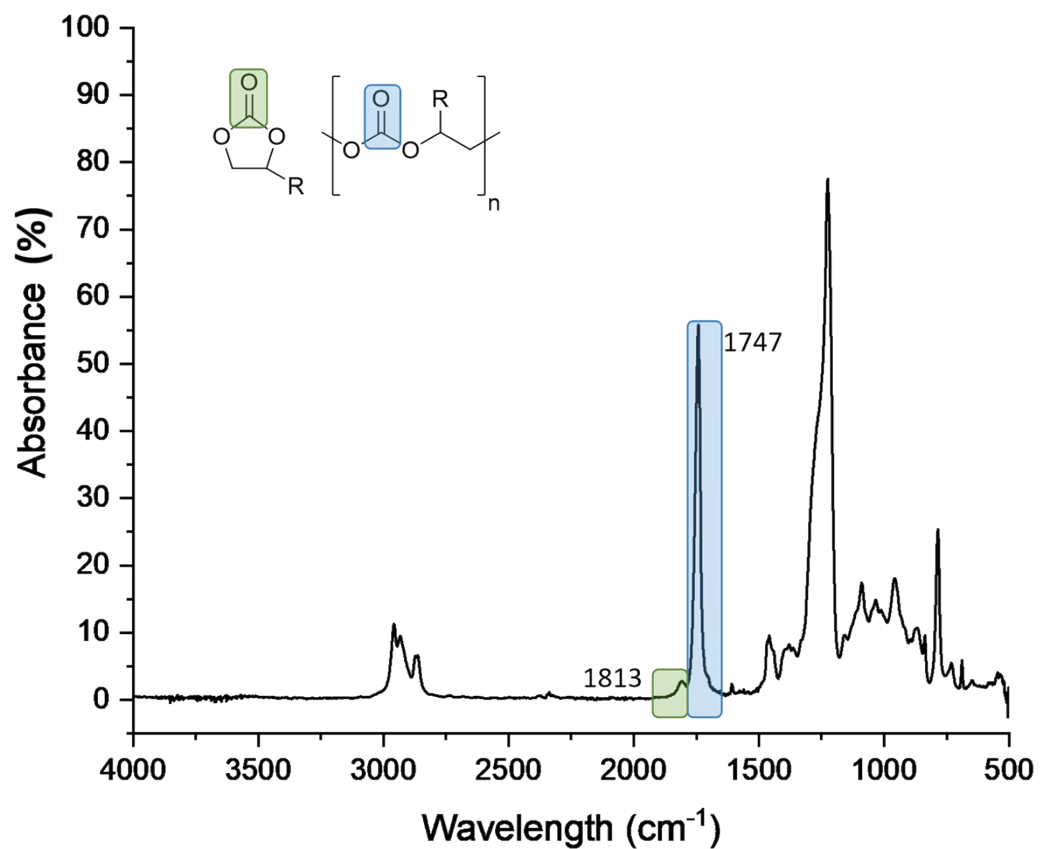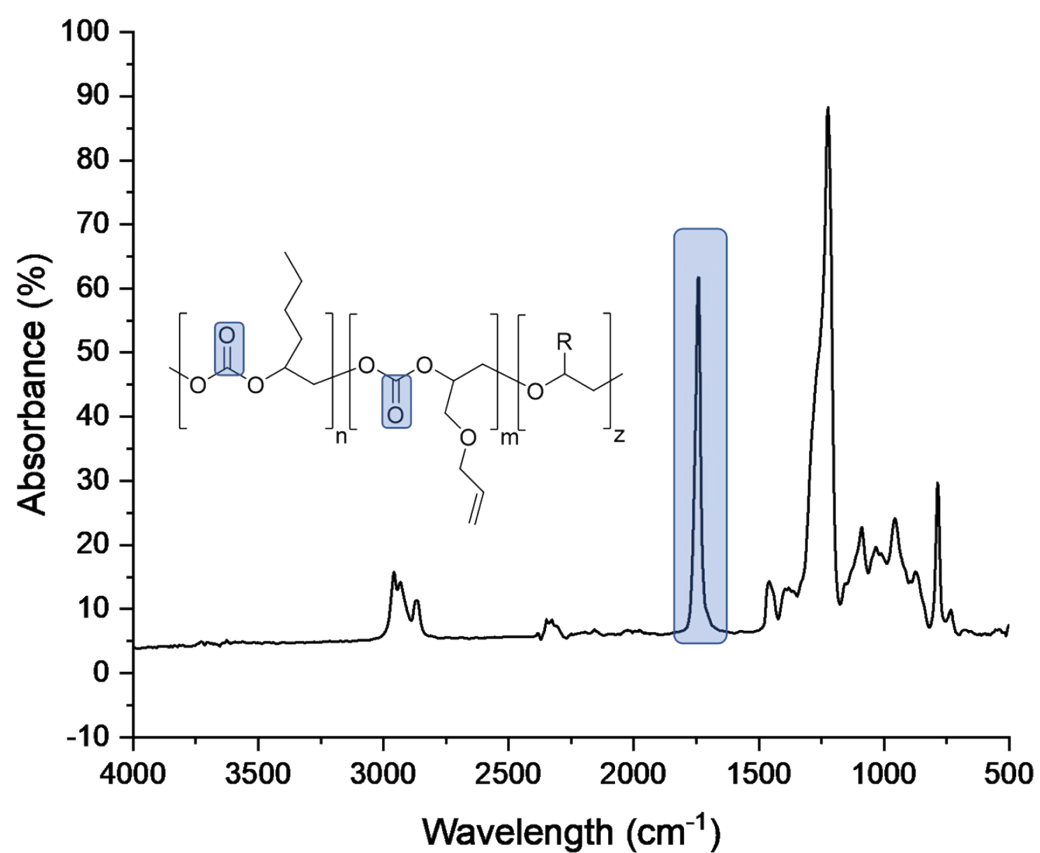

Figure S8. FT-IR spectrum of the crude mixture after the terpolymerisation of 1,2-epoxyhexane and AGE (95:5) with  $\text{CO}_2$  (top) and of the purified polycarbonate (bottom).

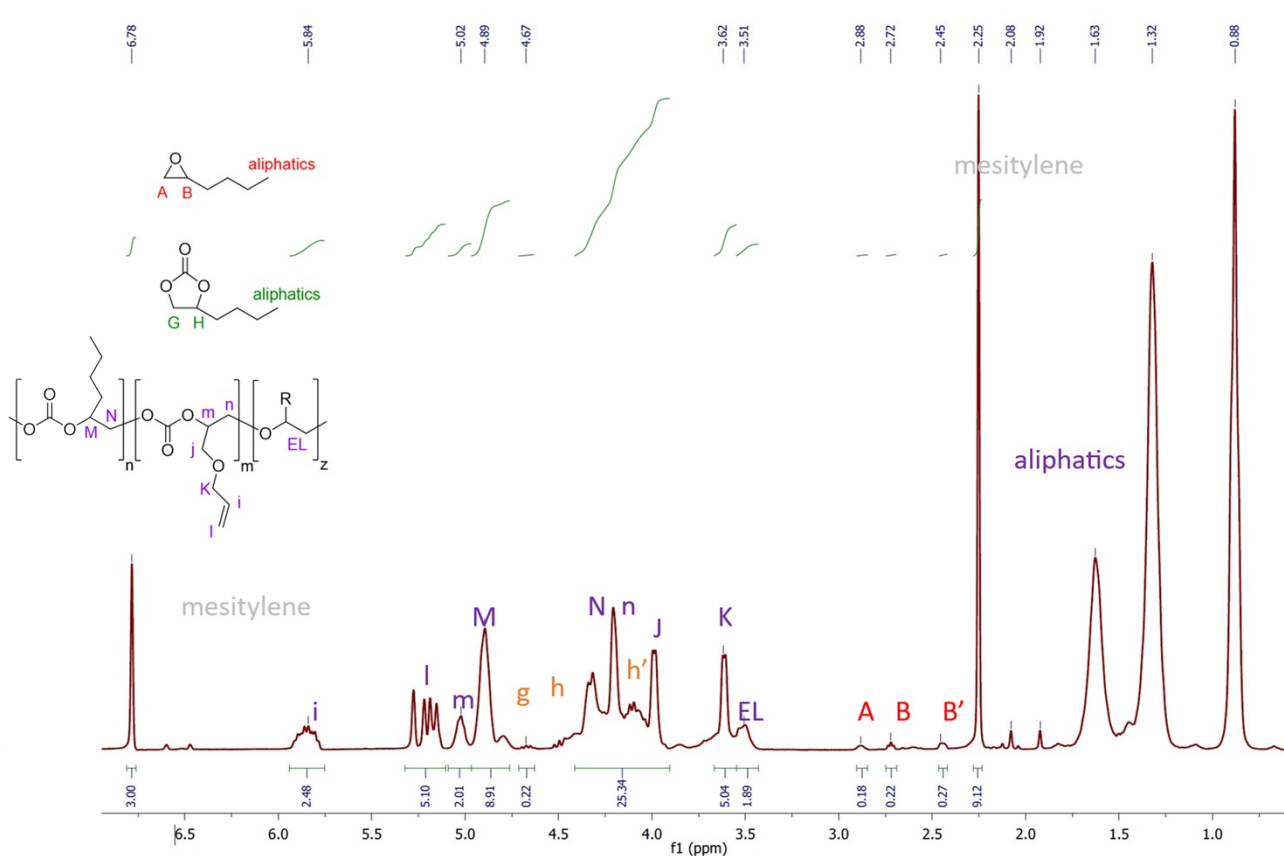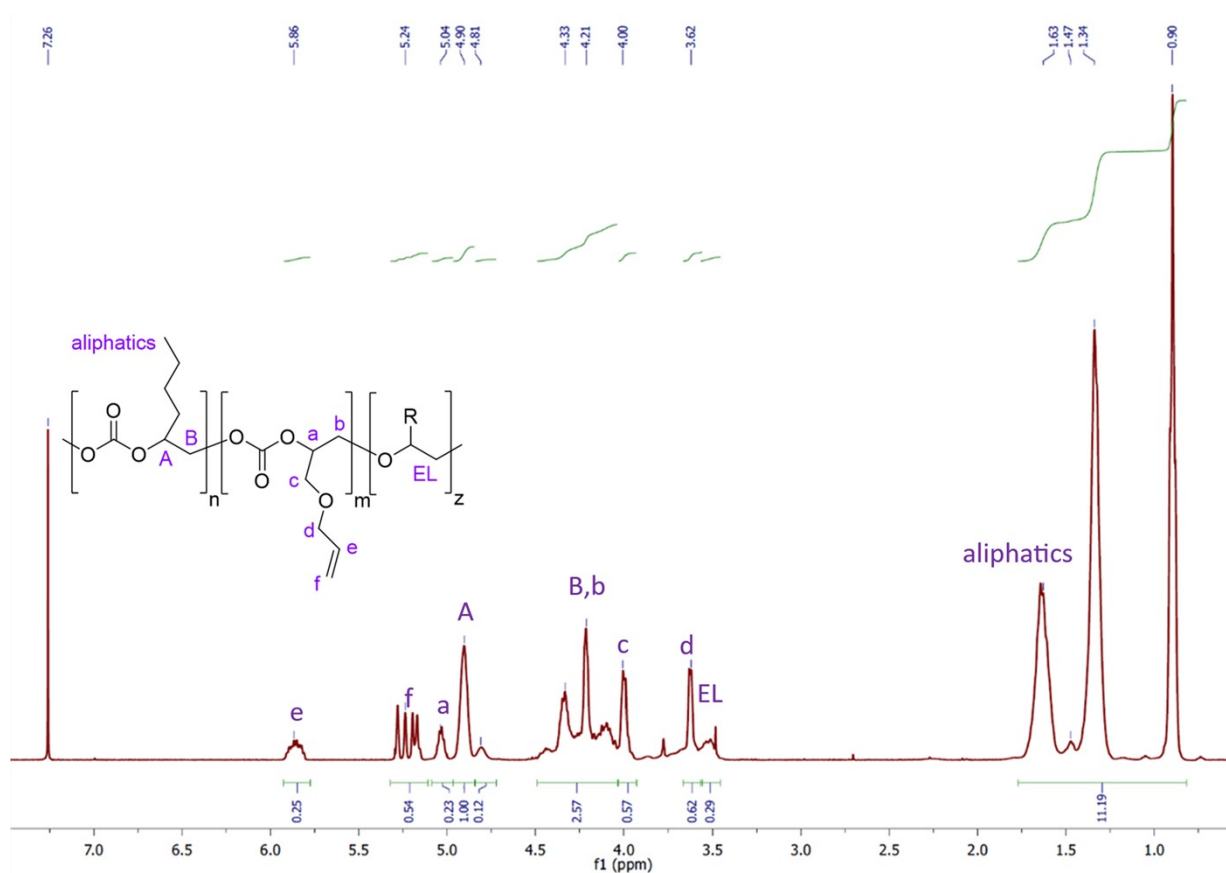

Figure S9.  $^1\text{H}$  NMR spectrum of the crude mixture after the terpolymerisation of 1,2-epoxyhexane and AGE (80:20) with  $\text{CO}_2$  (top) and of the purified polycarbonate (bottom).

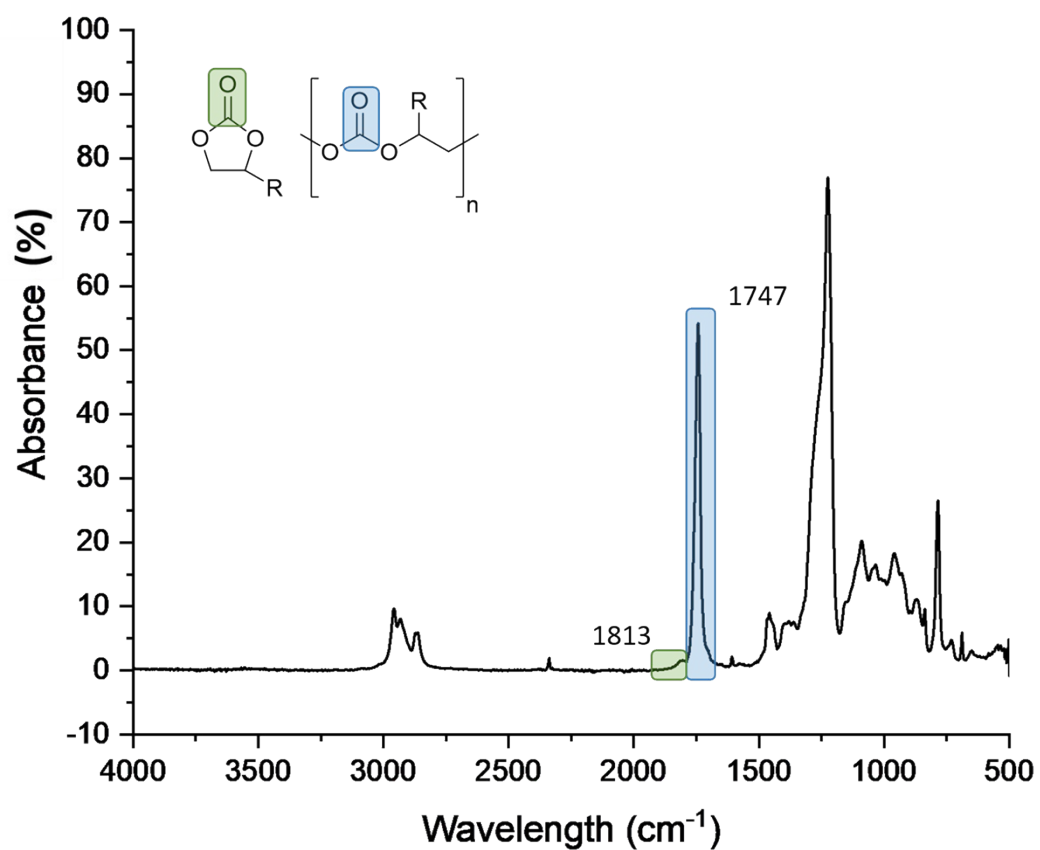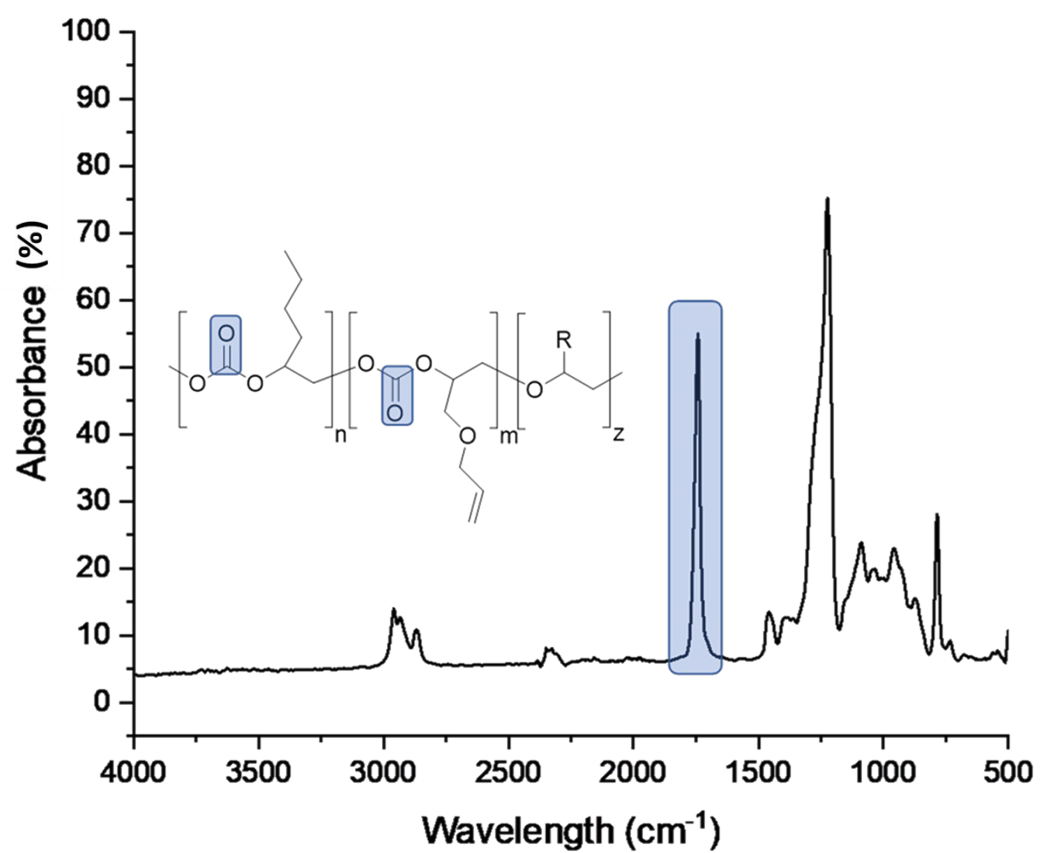

Figure S10. FT-IR spectrum of the crude mixture after the terpolymerisation of 1,2-epoxyhexane and AGE (80:20) with CO<sub>2</sub> (top) and of the purified polycarbonate (bottom).

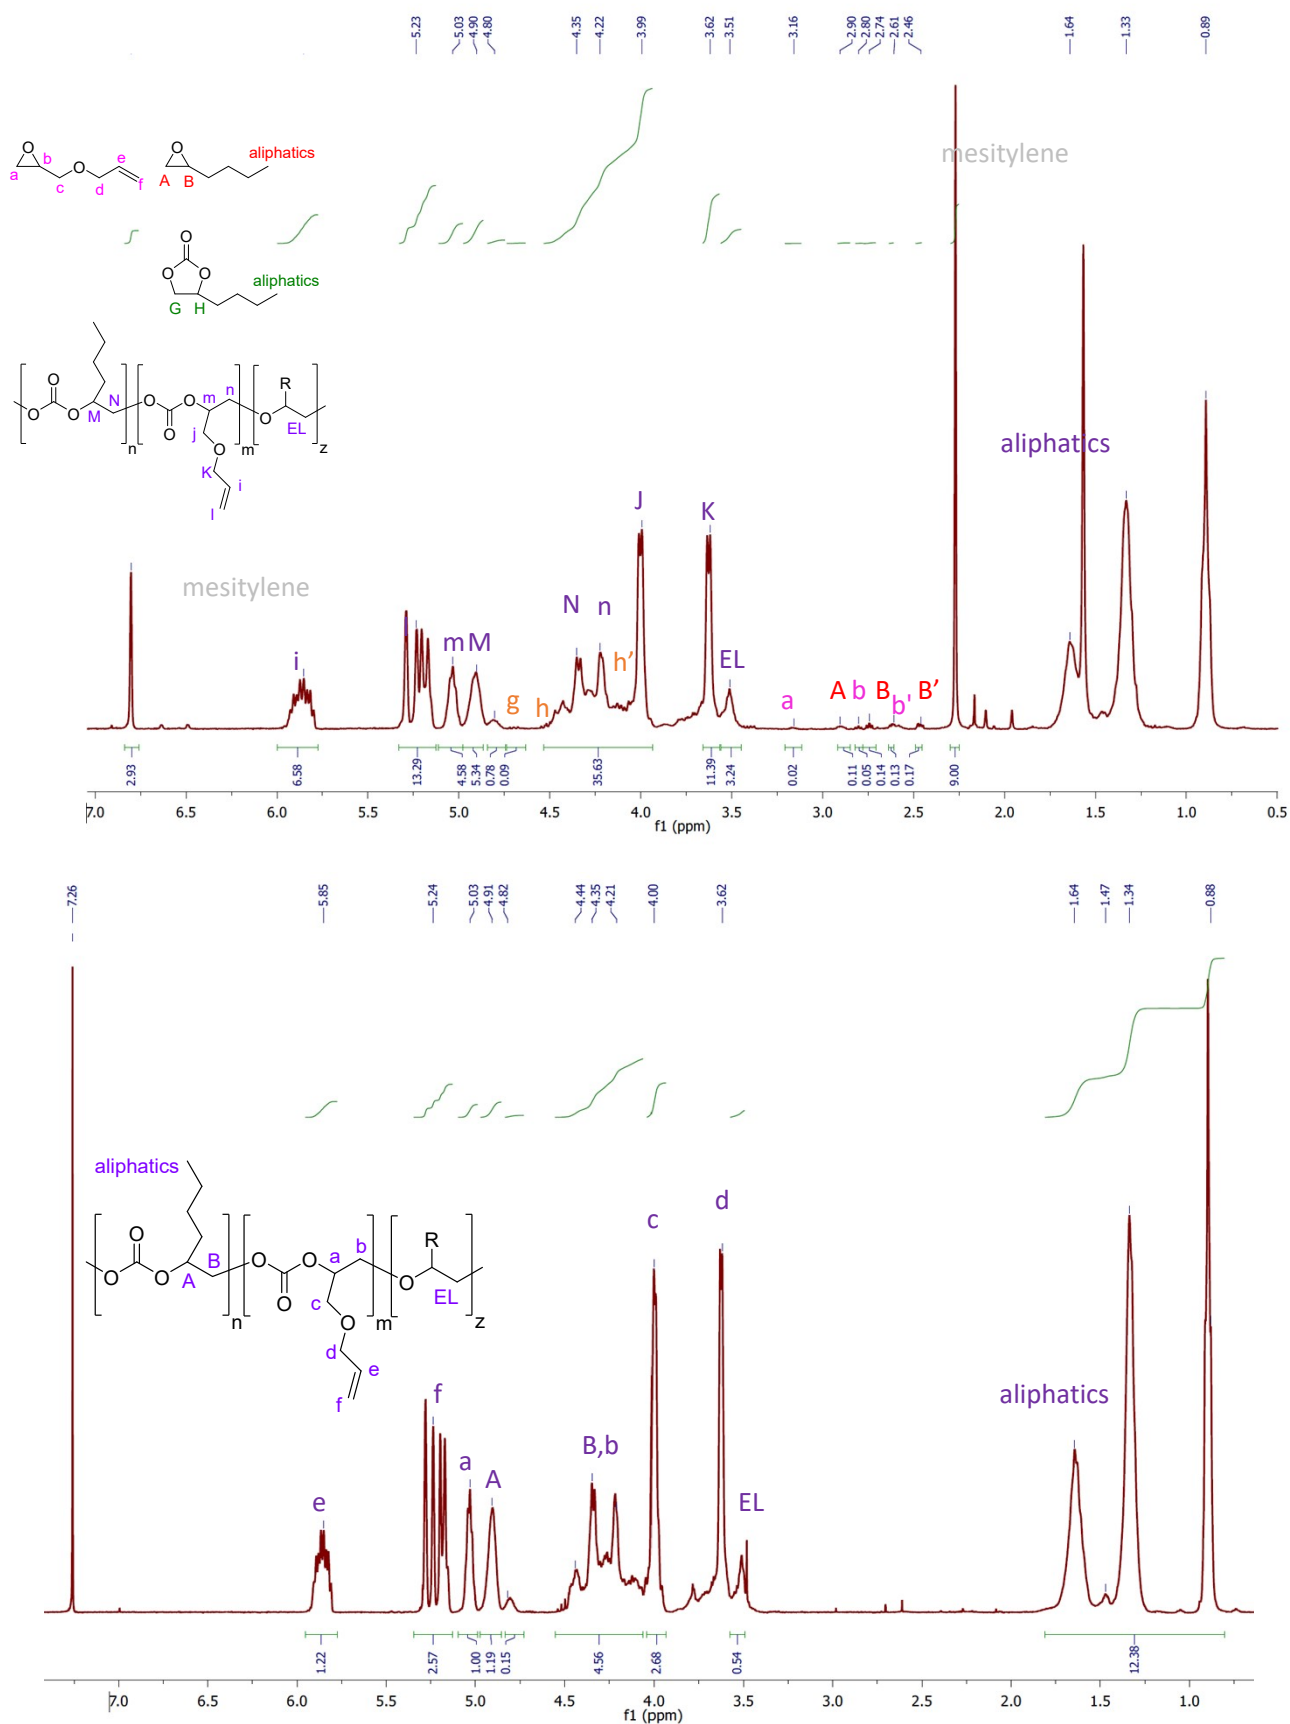

Figure S11.  $^1\text{H}$  NMR spectrum of the crude mixture after the terpolymerisation of 1,2-epoxyhexane and AGE (50:50) with  $\text{CO}_2$  (top) and of the purified polycarbonate (bottom).

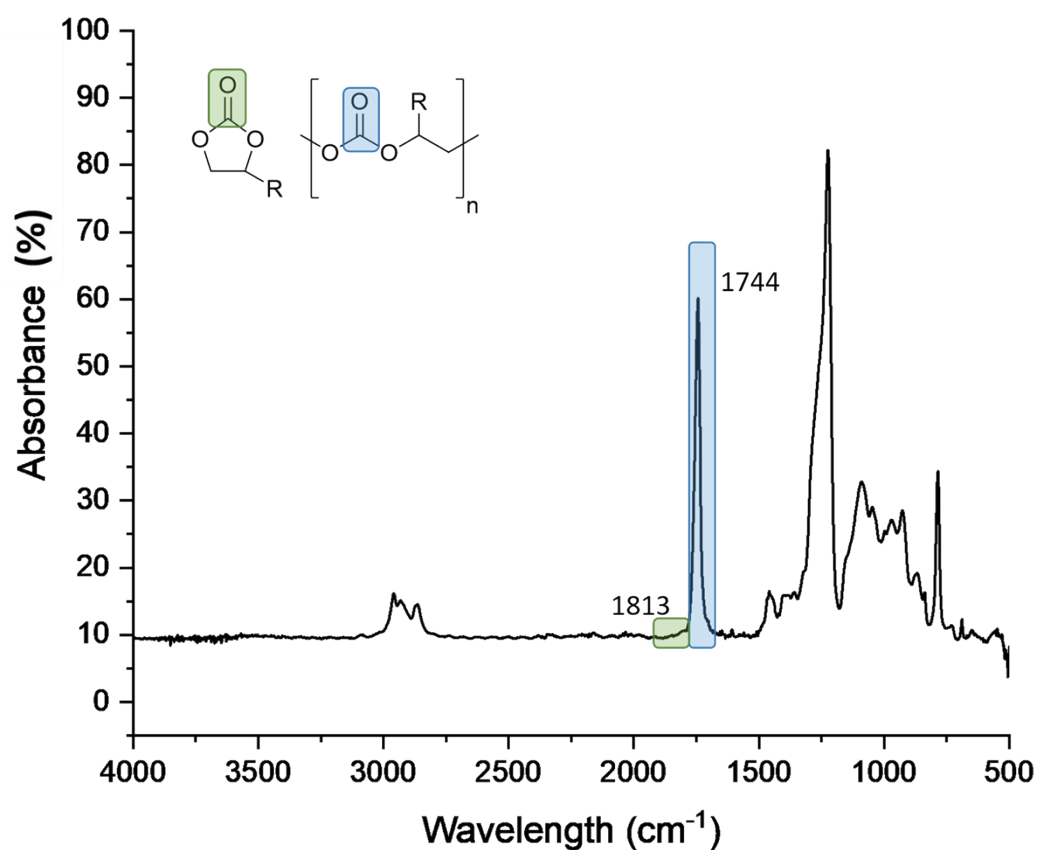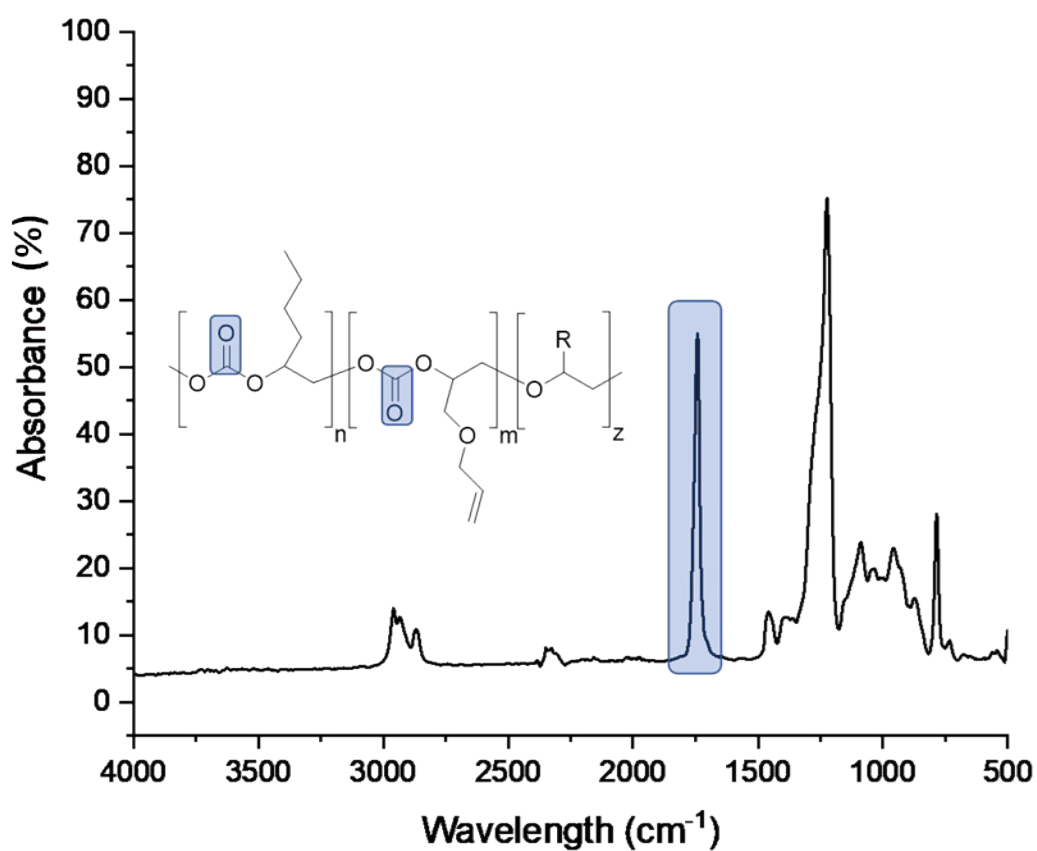

Figure S12. FT-IR spectrum of the crude mixture after the terpolymerisation of 1,2-epoxyhexane and AGE (50:50) with CO<sub>2</sub> (top) and of the purified polycarbonate (bottom).

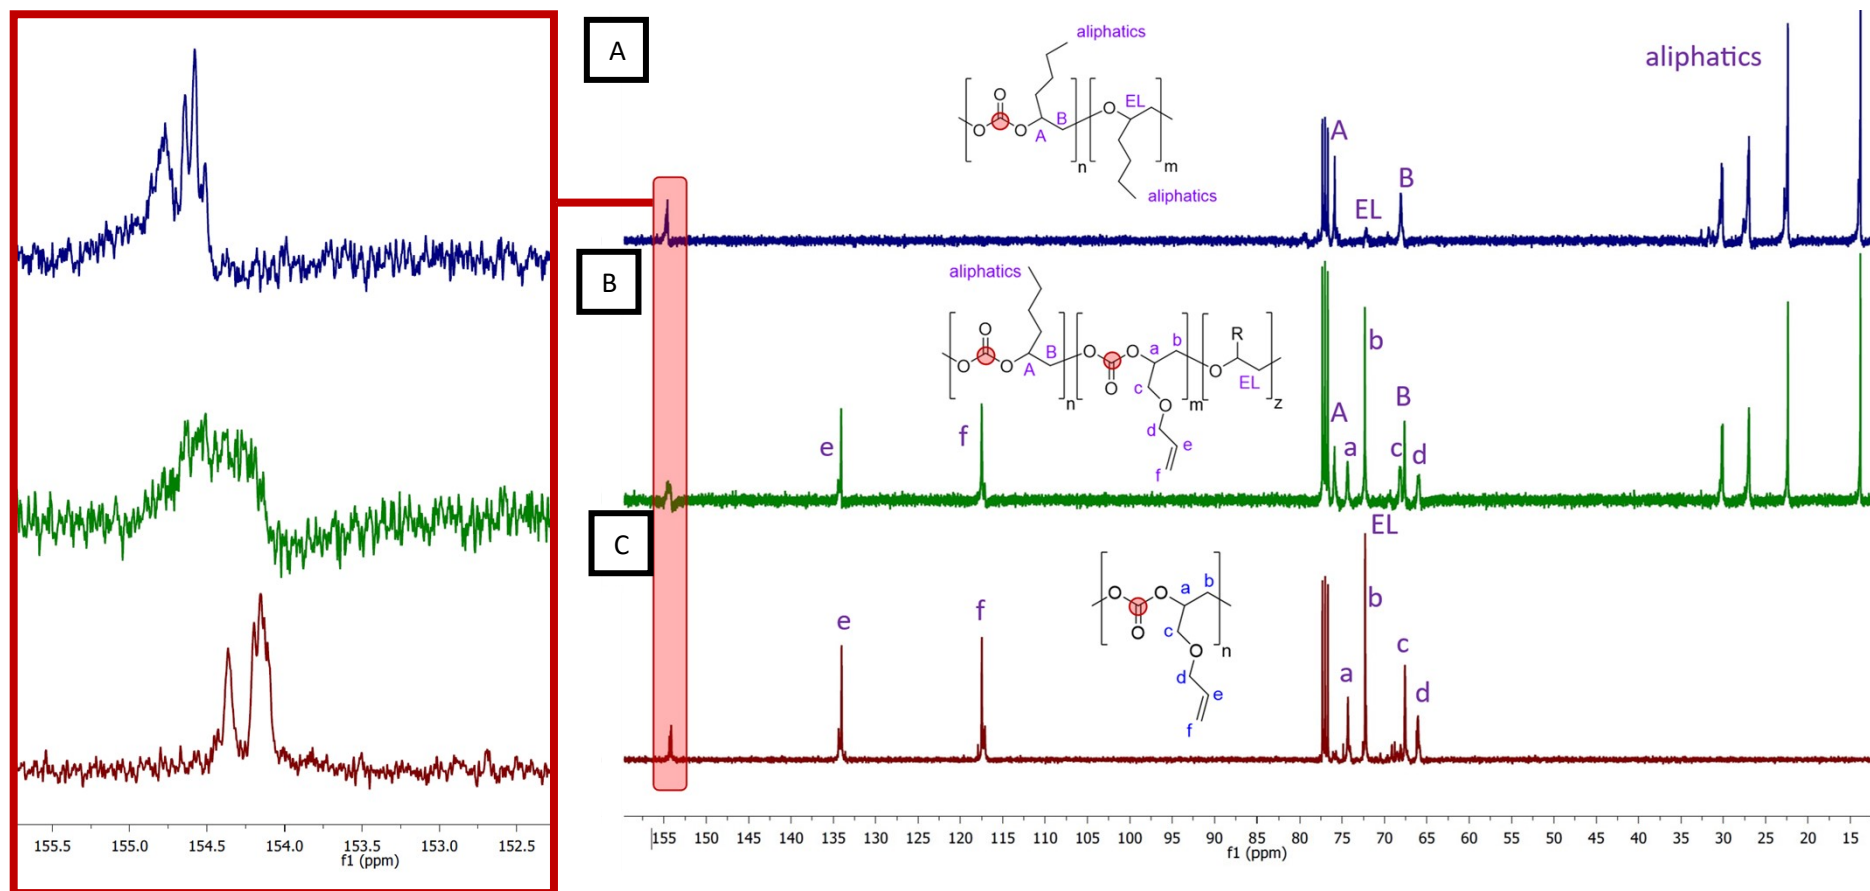

Figure S13.  $^{13}\text{C}$  NMR spectra of: (A) polycarbonate copolymer of 1,2-epoxyhexane, in blue; (B) polycarbonate terpolymer of 1,2-epoxyhexane:AGE = 50:50, in green; and (C) polycarbonate copolymer of AGE, in red. The region of the signals of PC carbonyls is highlighted in burgundy red. On the left: zoom-in of the carbonate signals of the three samples; no preferential polymerisation regiochemistry was observed in the terpolymerisation (random terpolymer, in green).

## DSC analysis

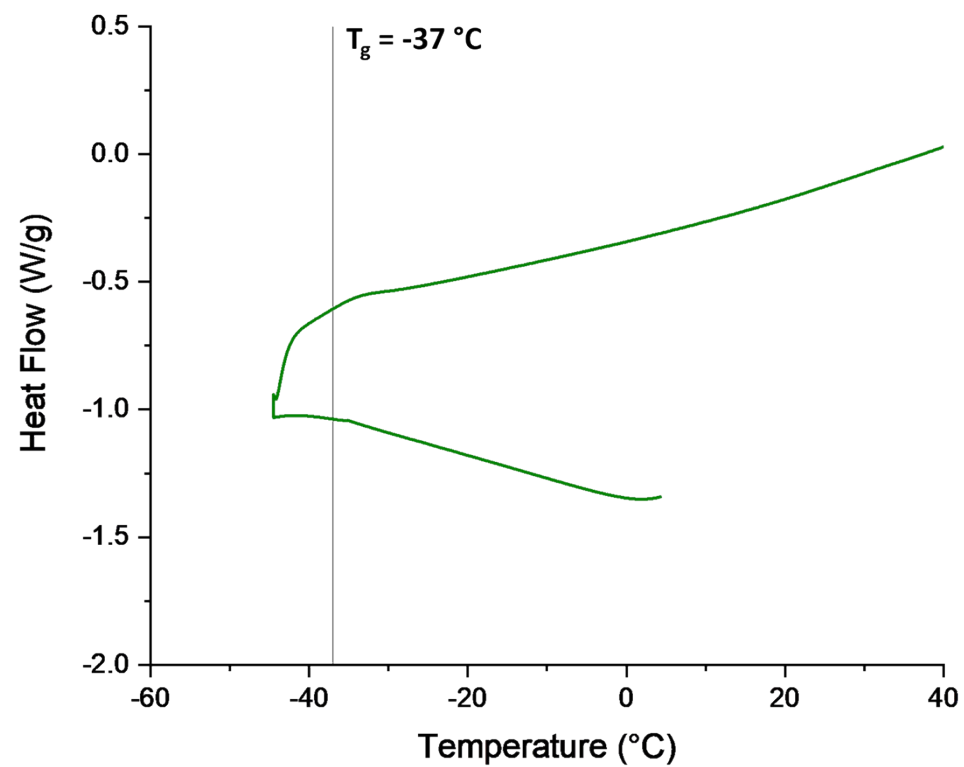

Figure S14. DSC curve of AGE polycarbonate (copolymer).  
 $T_g$  determined from the heating branch (top).

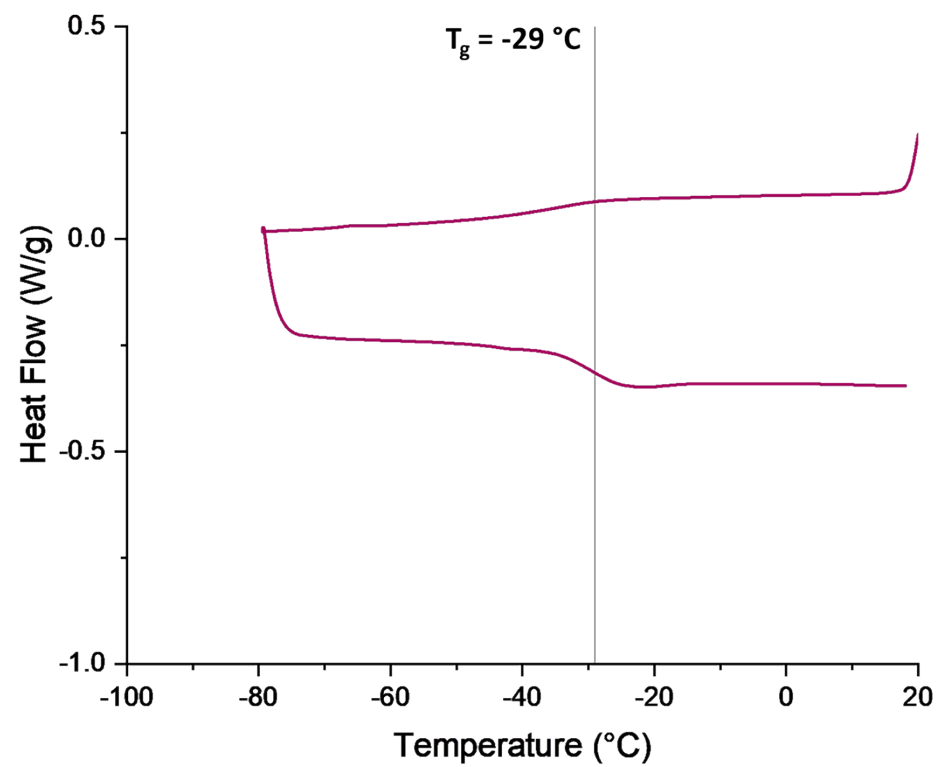

Figure S15. DSC curve of 1,2-epoxyhexane polycarbonate (copolymer).  
 $T_g$  determined from the heating branch (bottom).

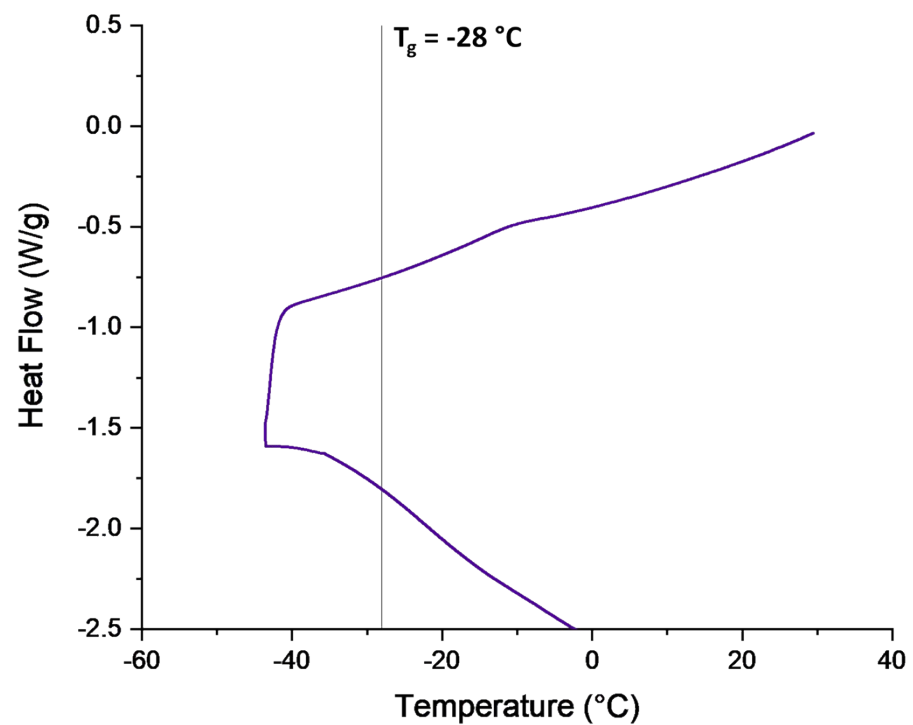

Figure S16. DSC curve of 1,2-epoxyoctane polycarbonate (copolymer).  $T_g$  determined from the heating branch (top).

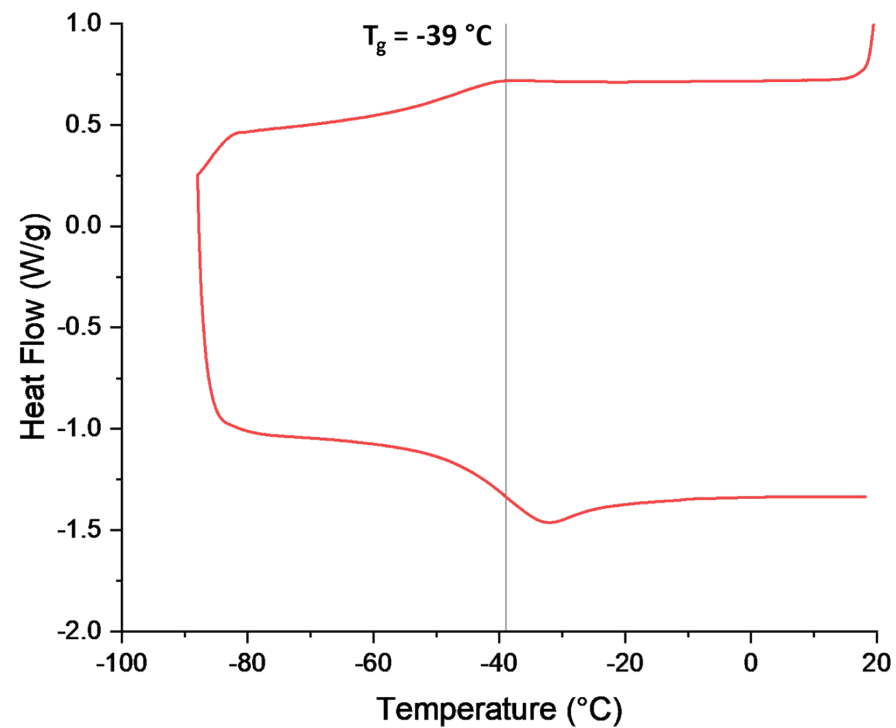

Figure S17. DSC curve of 1,2-epoxydecane polycarbonate (copolymer).  $T_g$  determined from the heating branch (bottom).

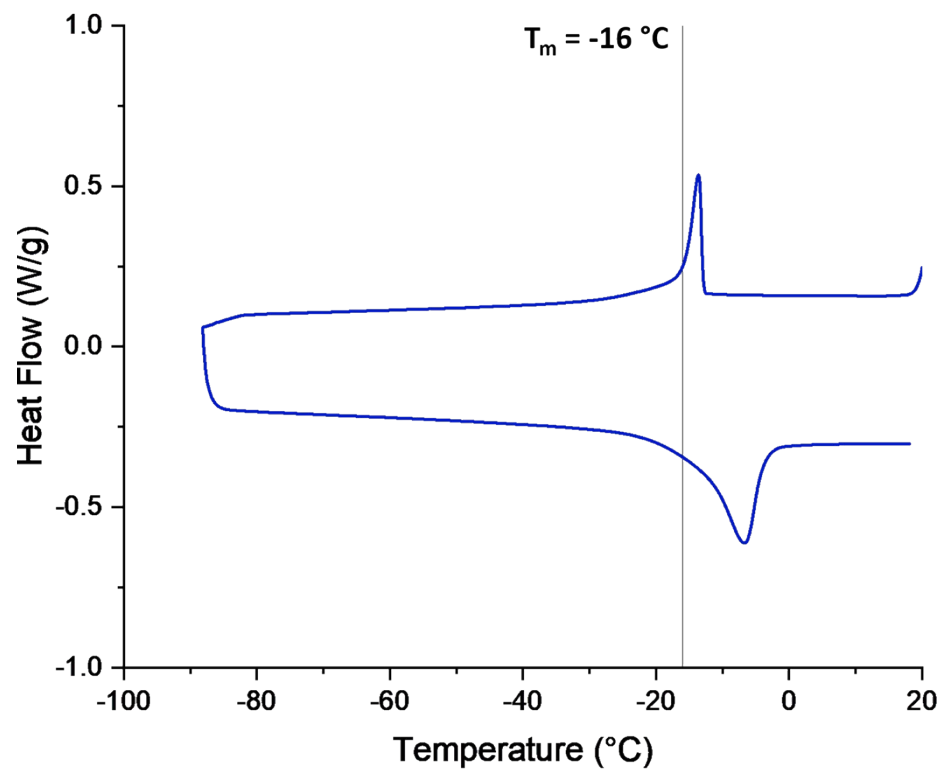

Figure S18. DSC curve of 1,2-epoxydodecane polycarbonate (copolymer).  $T_m$  determined from the heating branch (bottom).

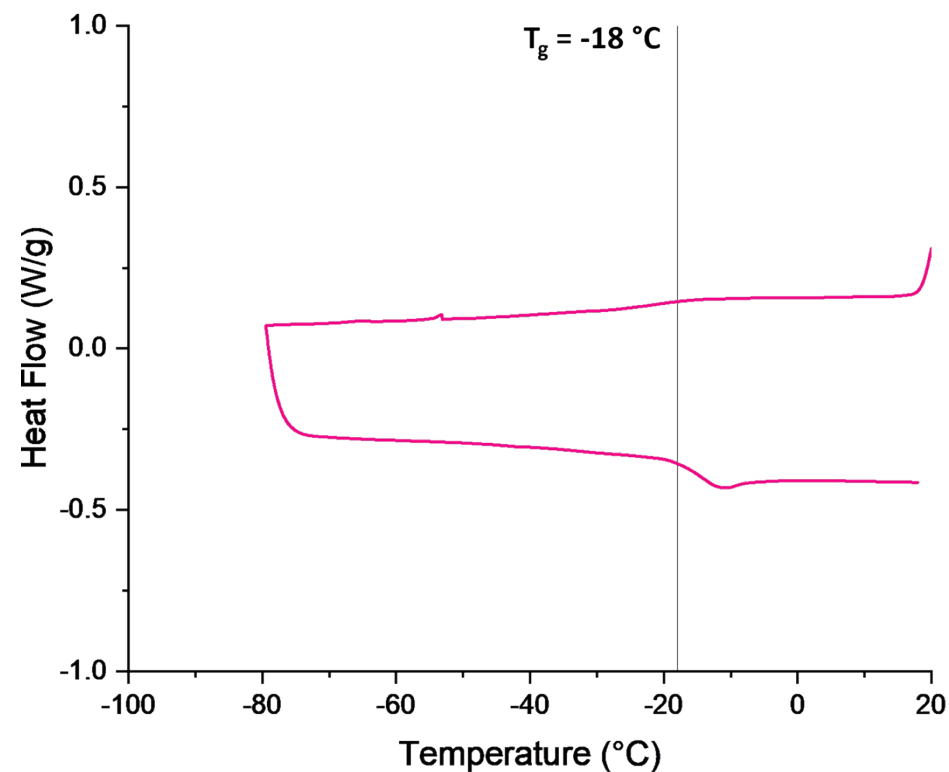

Figure S19. DSC curve of 1,2-epoxyhexane:AGE = 95:5 polycarbonate (terpolymer).  $T_g$  determined from the heating branch (bottom).

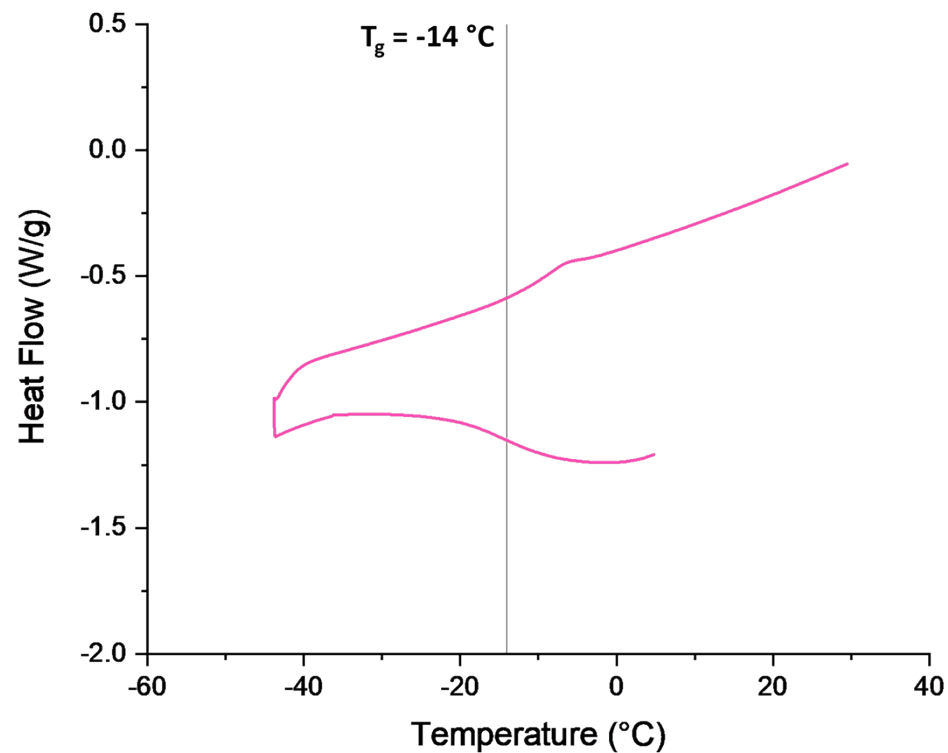

Figure S20. DSC curve of 1,2-epoxyhexane:AGE = 80:20 polycarbonate (terpolymer).  $T_g$  determined from the heating branch (top).

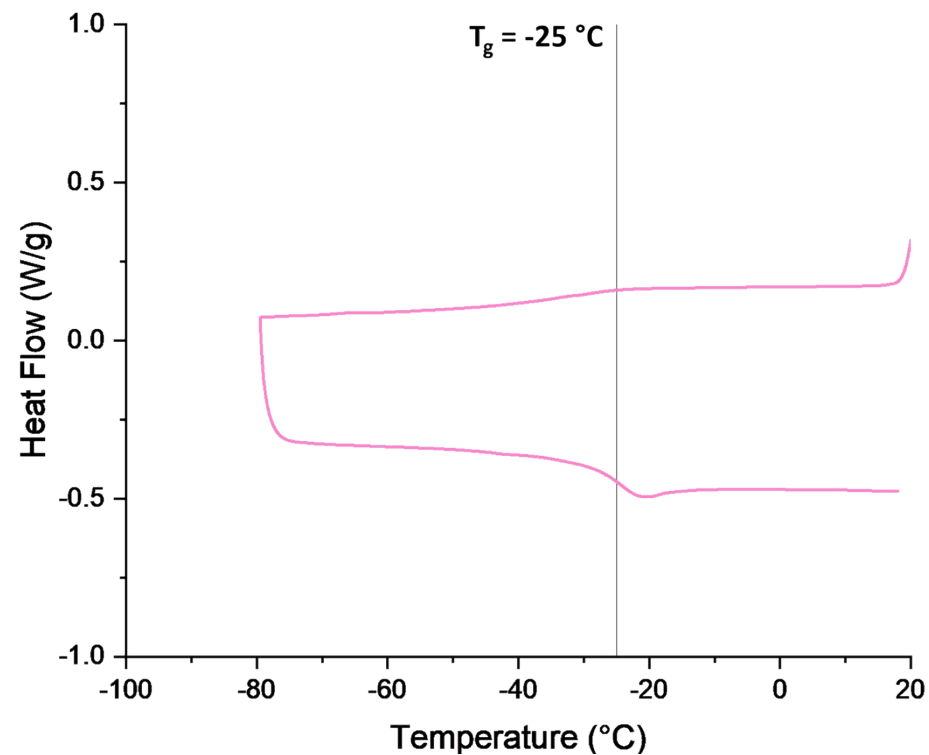

Figure S21. DSC curve of 1,2-epoxyhexane:AGE = 50:50 polycarbonate (terpolymer).  $T_g$  determined from the heating branch (bottom).

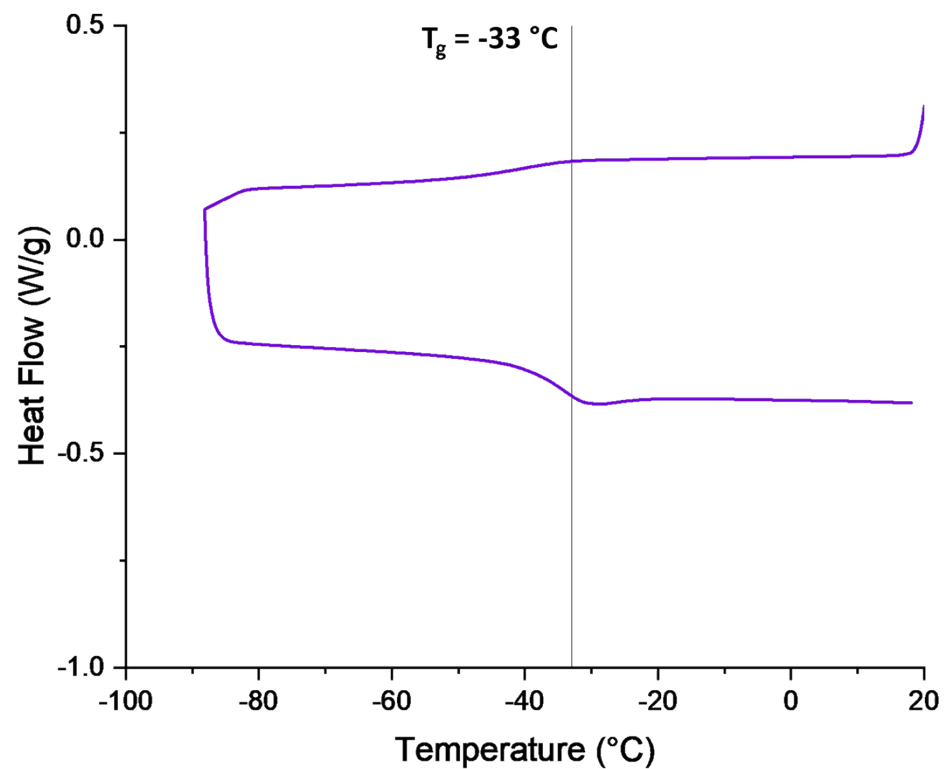

Figure S22. DSC curve of 1,2-epoxyoctane:AGE = 95:5 polycarbonate (terpolymer).  $T_g$  determined from the heating branch (bottom).

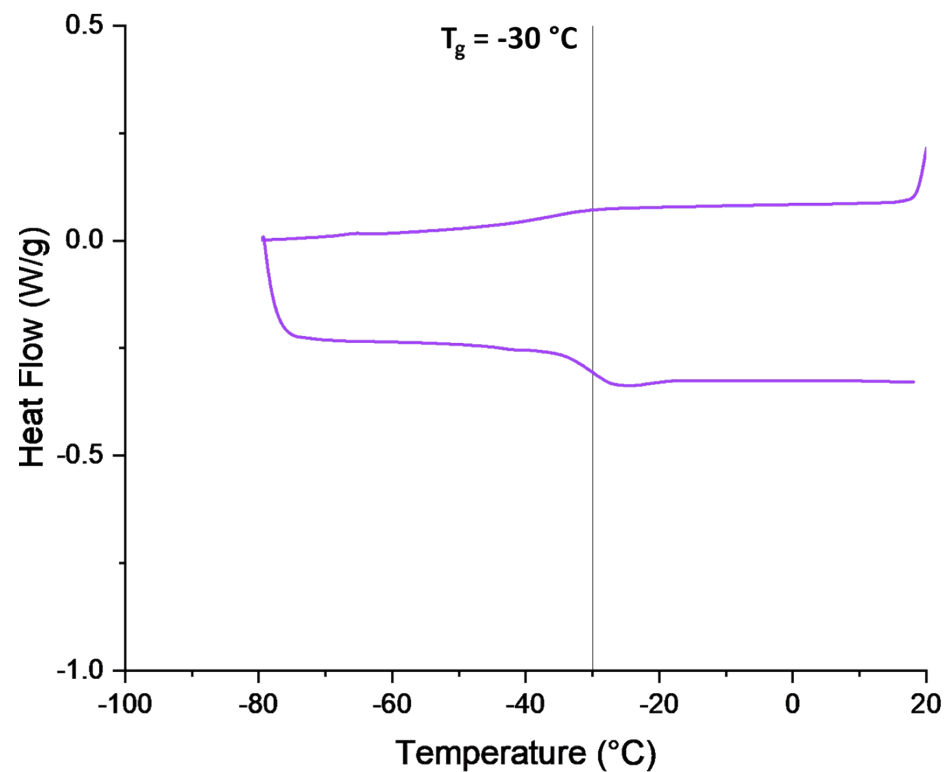

Figure S23. DSC curve of 1,2-epoxyoctane:AGE = 80:20 polycarbonate (terpolymer).  $T_g$  determined from the heating branch (bottom).

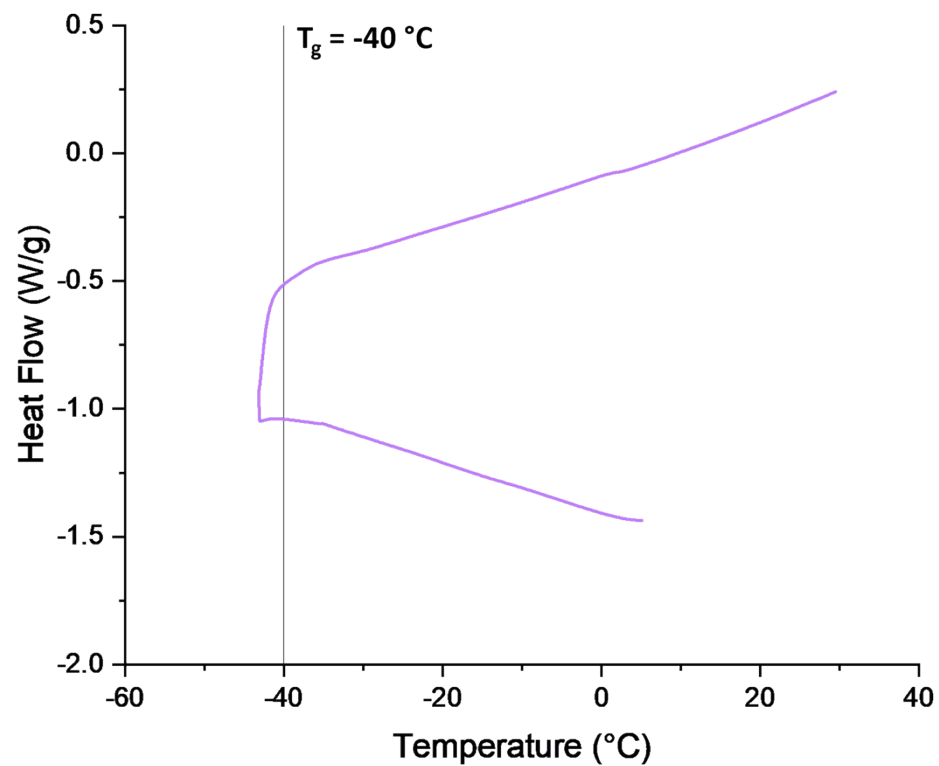

Figure S24. DSC curve of 1,2-epoxyoctane:AGE = 50:50 polycarbonate (terpolymer).  $T_g$  determined from the heating branch (top).

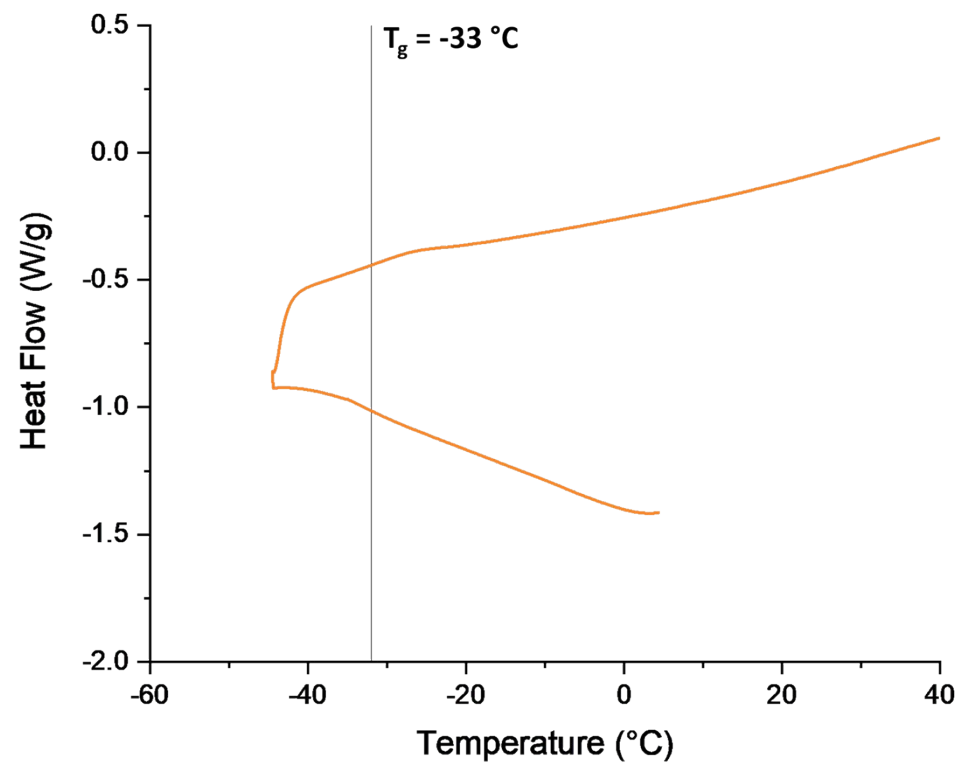

Figure S25. DSC curve of 1,2-epoxydecane:AGE = 95:5 polycarbonate (terpolymer).  $T_g$  determined from the heating branch (top).

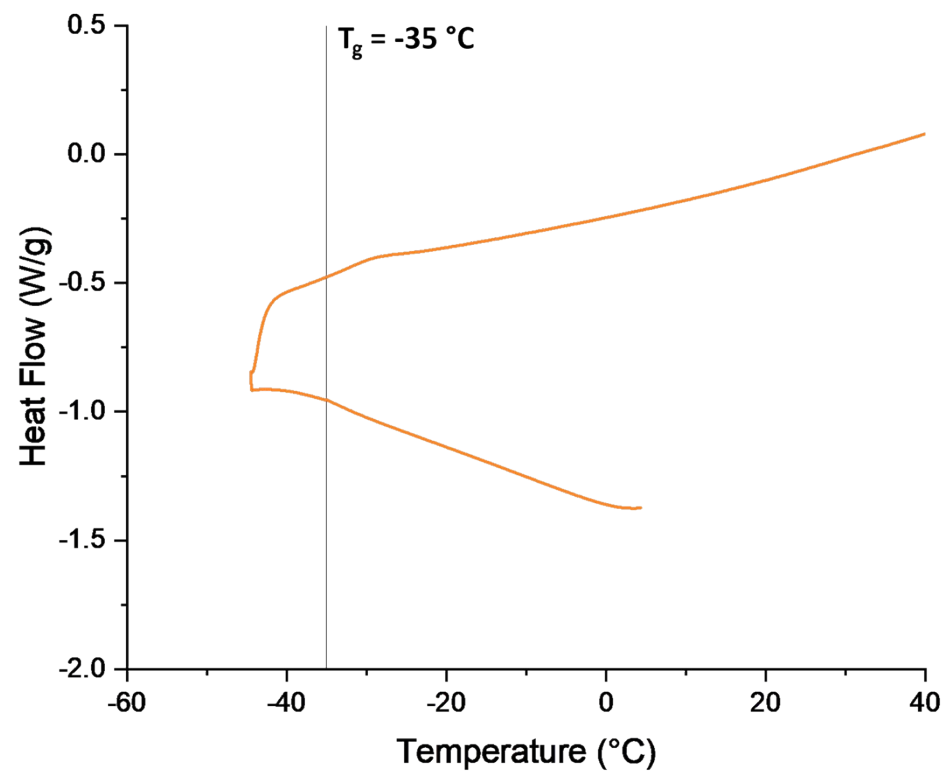

Figure S26. DSC curve of 1,2-epoxydecane:AGE = 80:20 polycarbonate (terpolymer).  $T_g$  determined from the heating branch (top).

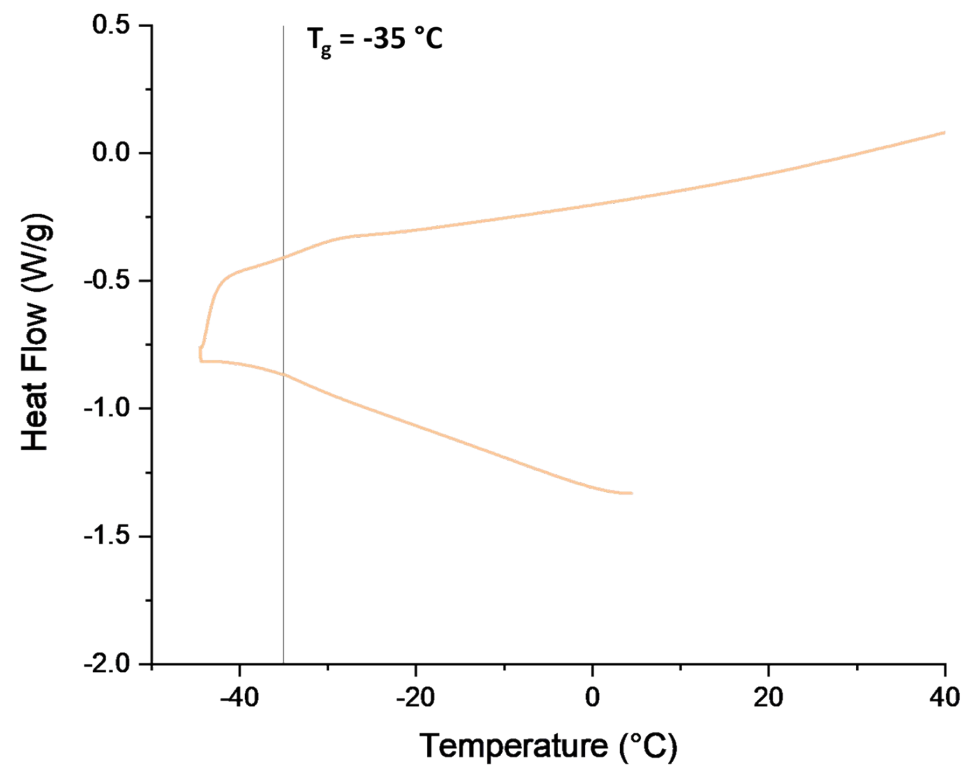

Figure S27. DSC curve of 1,2-epoxydecane:AGE = 50:50 polycarbonate (terpolymer).  $T_g$  determined from the heating branch (top).

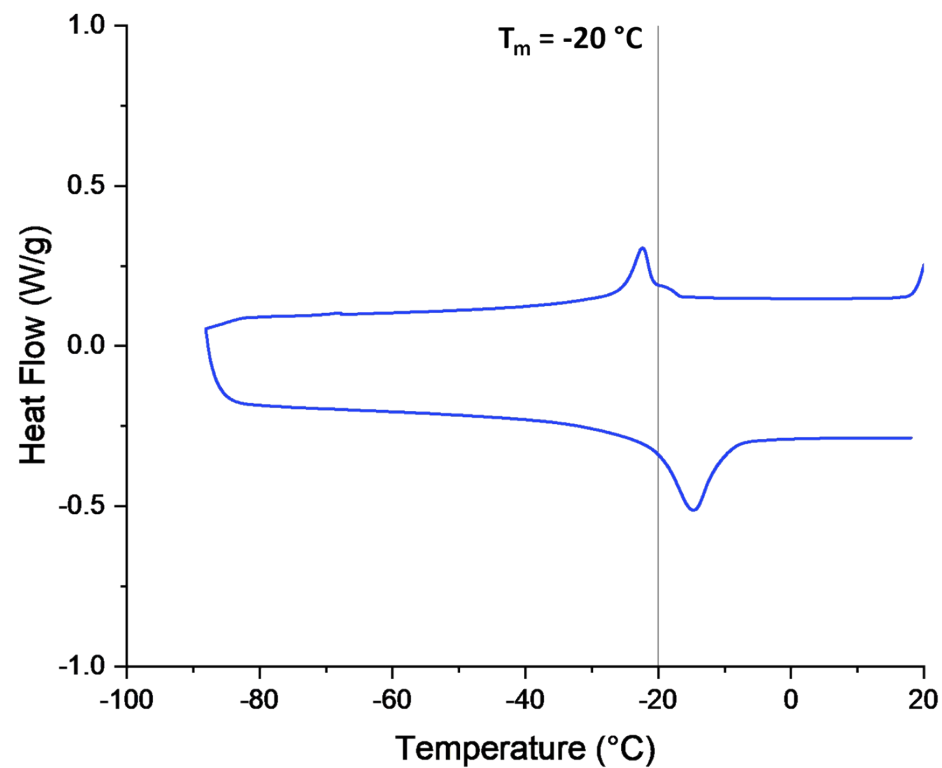

Figure S28. DSC curve of 1,2-epoxydodecane:AGE = 95:5 polycarbonate (terpolymer).  $T_m$  determined from the heating branch (bottom).

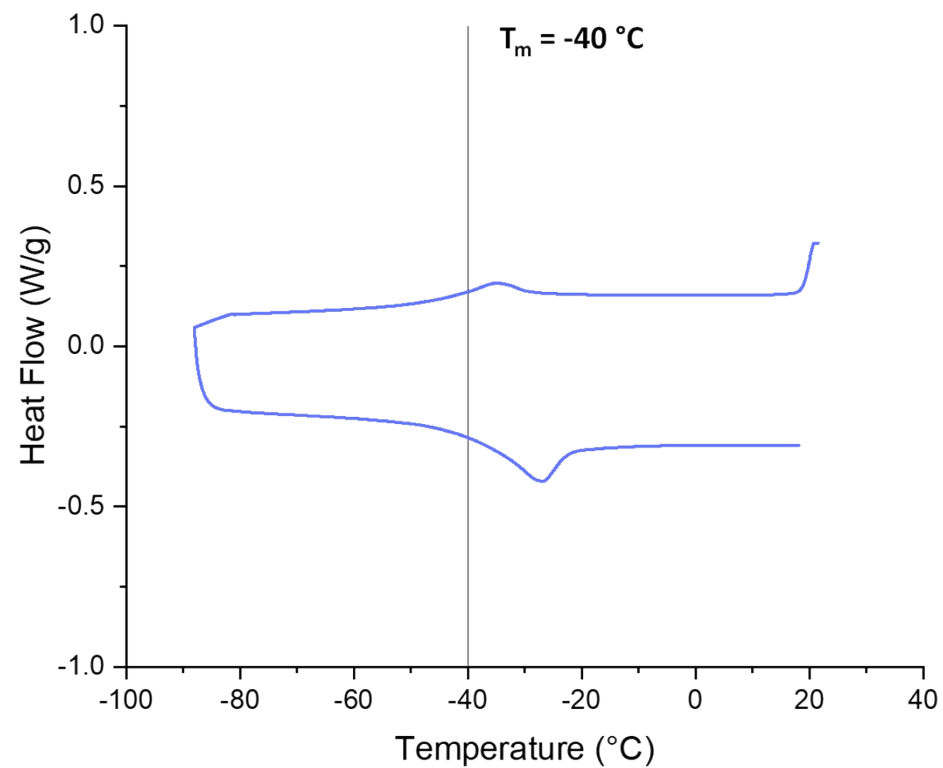

Figure S29. DSC curve of 1,2-epoxydodecane:AGE = 80:20 polycarbonate (terpolymer).  $T_m$  determined from the heating branch (bottom).

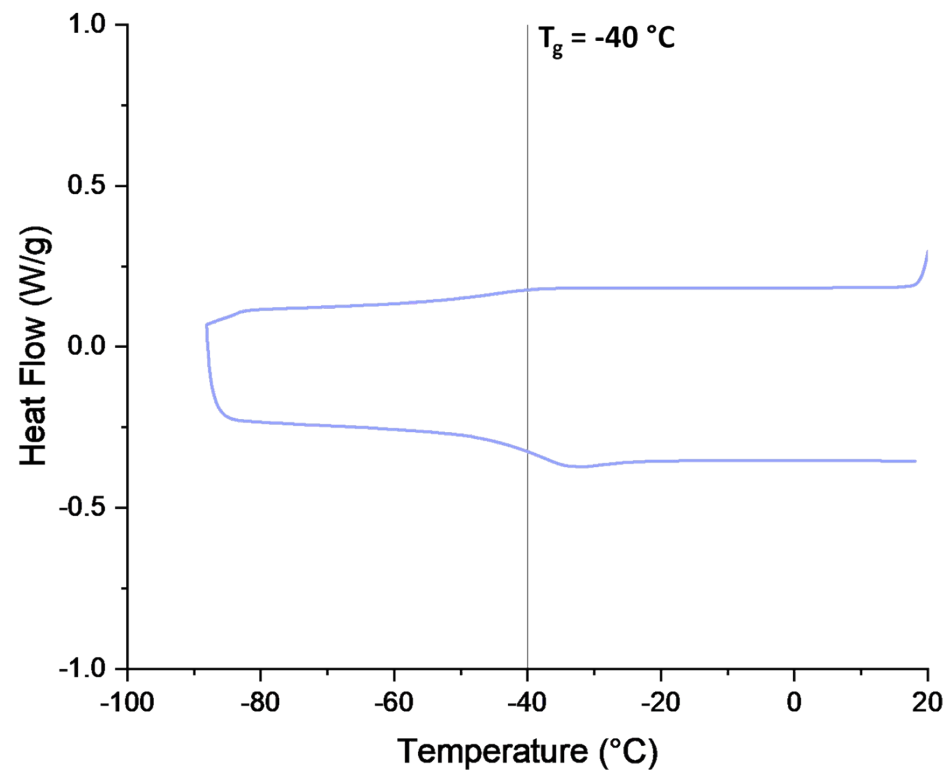

Figure S30. DSC curve of 1,2-epoxydodecane:AGE = 50:50 polycarbonate (terpolymer).  $T_g$  determined from the heating branch (bottom).

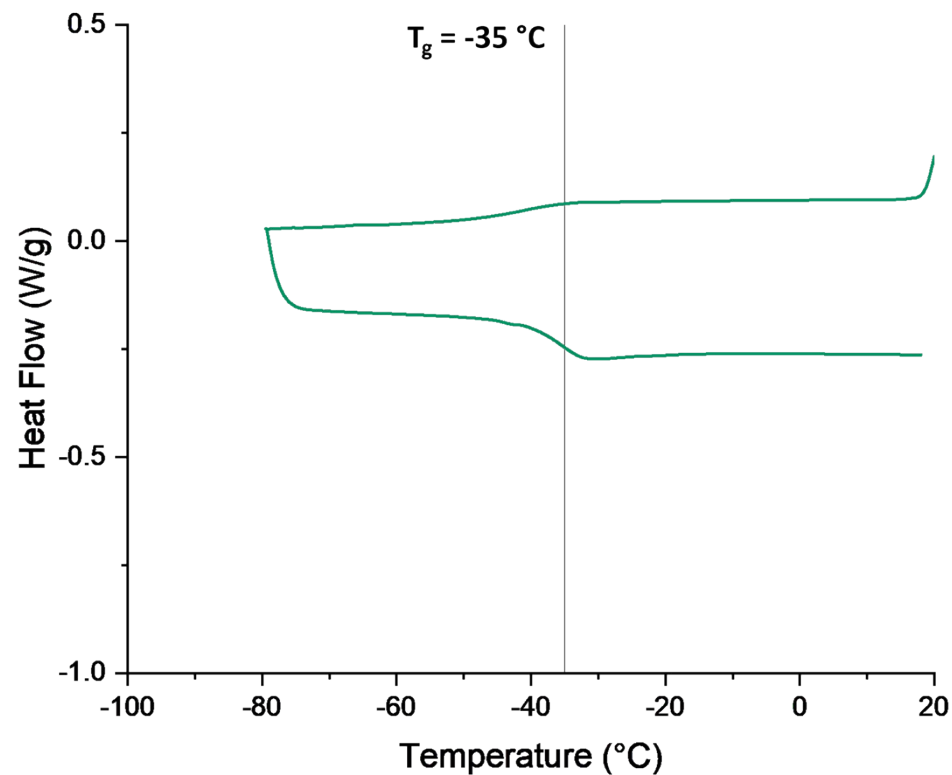

Figure S31. DSC curve of AGE polycarbonate (copolymer) prepared on large scale.  $T_g$  determined from the heating branch (bottom).

The vast majority of the examined polycarbonates showed a small and smooth change in the heat flow, which is consistent with a  $T_g$  peak.

DSC curves of polycarbonates synthesised from 1,2-epoxydodecane showed a  $T_m$  when [AGE] < 50. No  $T_g$  was detected in the analysed temperature range for these samples.

### Molecular weight curves measured by GPC/SEC

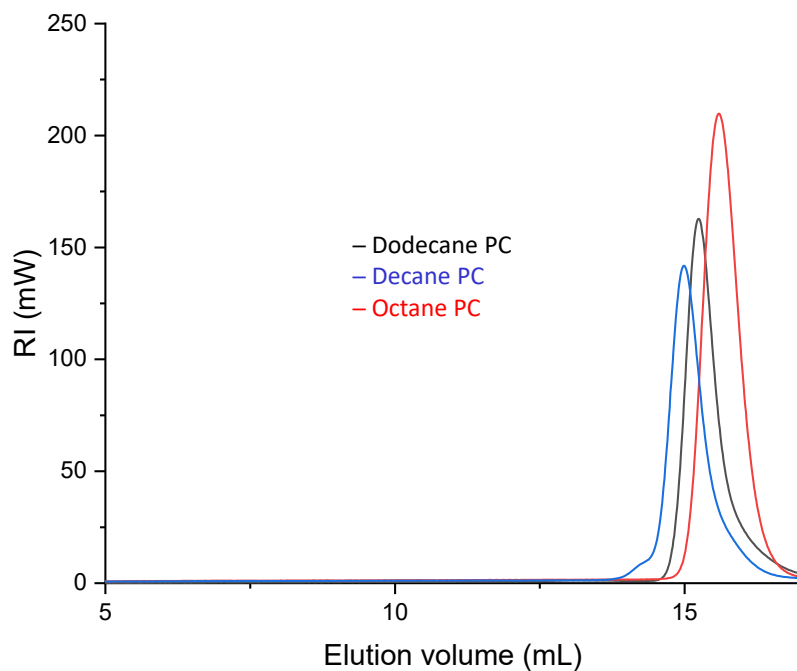

Figure S32. Examples of the monomodal GPC eluograms of the prepared copolymers: 1,2-epoxydodecane-based copolymer in black; 1,2-epoxydecane-based copolymer in blue; 1,2-epoxyoctane-based copolymer in red.

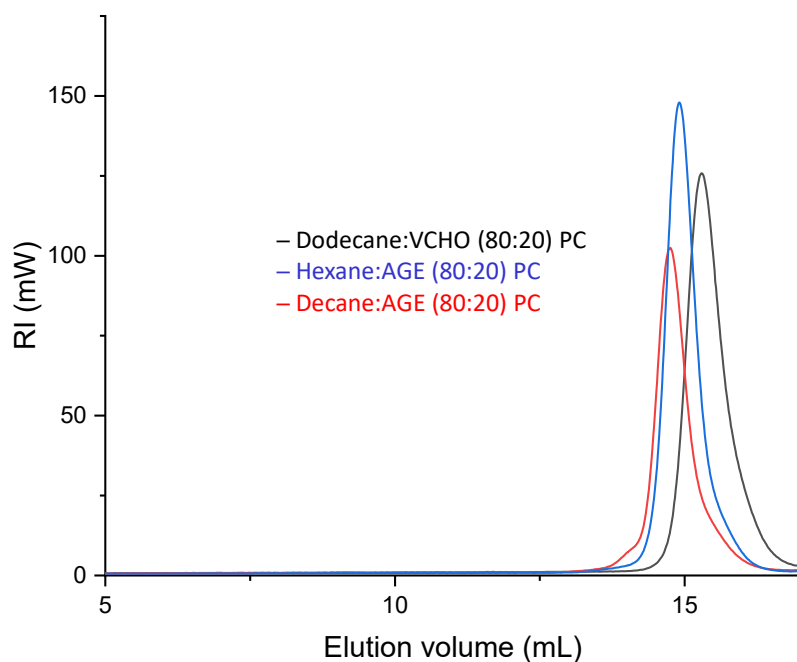

Figure S33. Examples of the monomodal GPC eluograms of the prepared terpolymers: 1,2-epoxydodecane:VCHO (80:20) terpolymer in black; 1,2-epoxyhexane:AGE (80:20) terpolymer in blue; 1,2-epoxydecane:AGE (80:20) terpolymer in red.

TGA

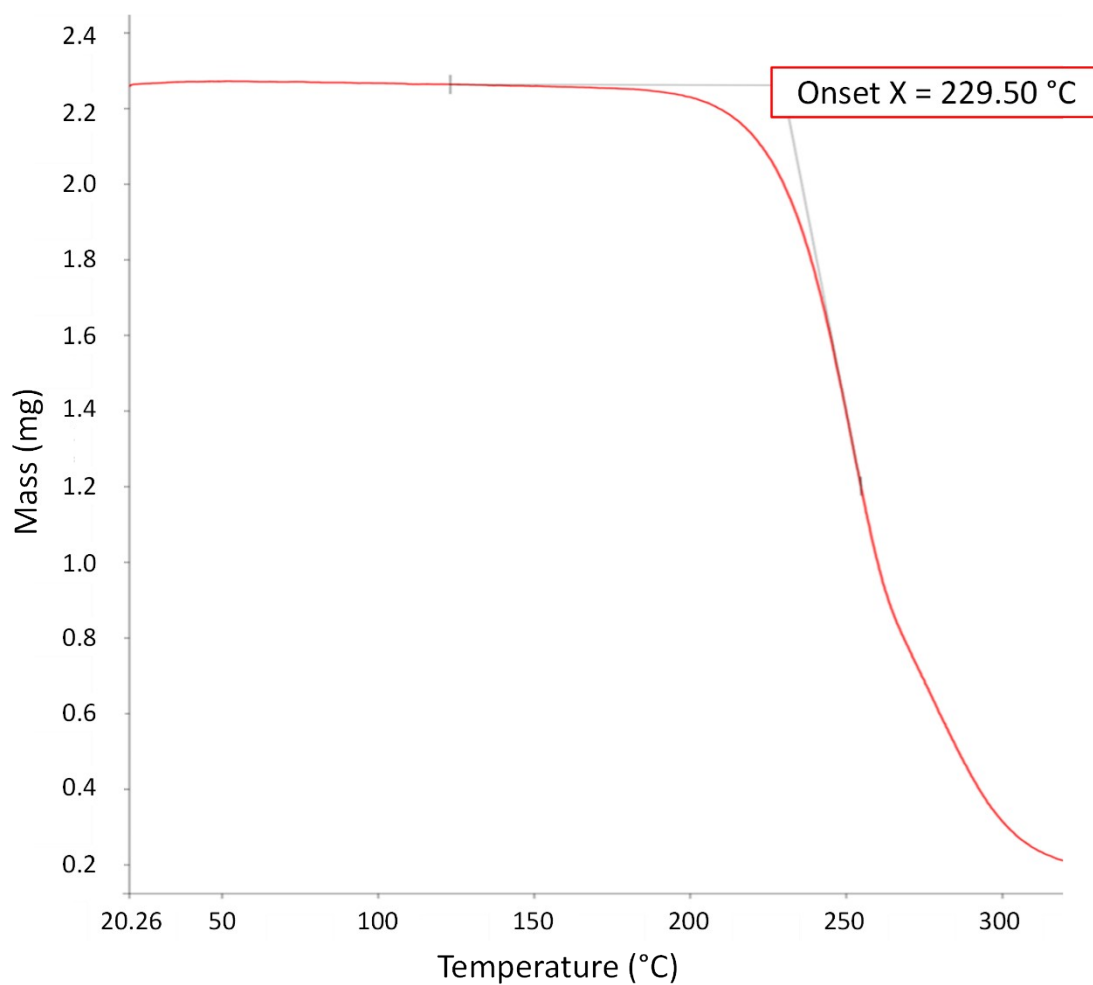

Figure S34. TGA of 1,2-epoxydecane:AGE = 80:20 polycarbonate (terpolymer). The temperature of the onset of the degradation was calculated as the intersection of the two tangents to the curve.

### Peroxide curing: relationship between curing temperature and curing time

Table S2. DCP half degradation time and complete curing depending on the cross-linking temperature.

| T (°C) | $t_{1/2}$ (min) | Full curing (min.) = 10 * $t_{1/2}$ |
|--------|-----------------|-------------------------------------|
| 130    | 75              | 750                                 |
| 140    | 25              | 250                                 |
| 150    | 8.8             | 88                                  |
| 160    | 3.2             | 32                                  |
| 170    | 1.23            | 12.3                                |

## Cross-linking setup

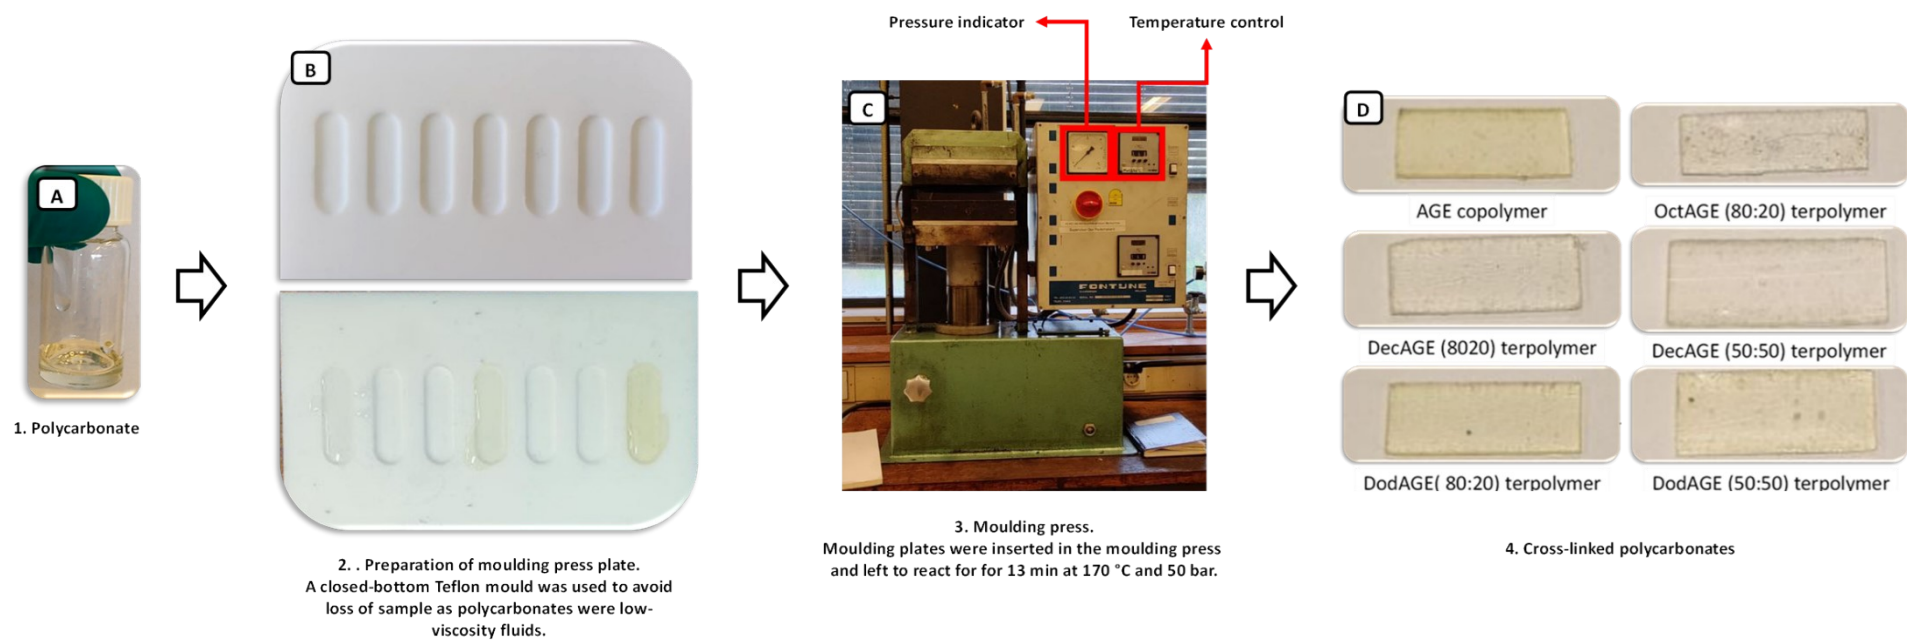

Figure S35. Cross-linking in a moulding press: (A) liquid polycarbonates before cross-linking; (B) a closed-bottom Teflon moulding plate to avoid polymers loss (the polycarbonates before cross-linking are low-viscosity fluids); (C) moulding press set-up; and (D) final cross-linked polycarbonates (solid).
